# Supplementary material for: Global ocean heat content over the past 3 million years
Source: Research Square preprint supplement (doi:10.21203/rs.3.rs-5610580/v1), 2025-01-06
Supplement: Supplementary file 1 [file 3d42550015f467468f5f8f56.xlsx]

## Sheet: Data synth
Core	top depth	bottom depth	Snapshot	d4038Ar	d4038 err	d3836Ar	d3836 err	d40Ar atm	d40Ar atm err	dXeKr	dXeKr err	dKrAr	dKrAr err		Argon Age	Age err	Age absolute err	dXeKrgravcorr	dXeXrgravcorr err	dKrArgravcorr		MOT	MOT err	MOT abs err		Benthic T component	Benthic T err	Benthic T abs err		T	dc	dw
ALHIC1901	134.465	134.525	'short'	0.106849	0.00539455	0.161073	0.00477182	-0.0566158	0.00408071	2.88641	0.174879	10.4149	0.120275		857.814	61.829	112.812	-0.982694	0.209045	6.84101		-0.982694	0.286928	0.576478		3.56743	0.0780899	0.156559		1.59149	3.56	0
ALHIC1901	135.195	135.355	'short'	0.123546	0.00539455	0.173132	0.00477182	-0.0515601	0.00408071	2.83015	0.174879	8.93386	0.120275		781.213	61.829	105.865	-1.32778	0.209045	5.09857		-1.32778	0.337964	0.603506		3.66179	0.0924185	0.164707
ALHIC1901	136.185	136.315	'short'	0.10138	0.00539455	0.154252	0.00477182	-0.0512311	0.00408071	3.23616	0.174879	9.48851	0.120275		776.229	61.829	105.42	-0.470724	0.209045	6.06884		-0.470724	0.229267	0.550057		3.42833	0.0619551	0.148297
ALHIC1901	136.575	136.665	'short'	0.126299	0.00539455	0.174327	0.00477182	-0.0515659	0.00408071	7.86987	0.174879	21.6592	0.120275		781.302	61.829	105.873	NaN	0.209045	17.7488
ALHIC1901	136.575	136.665	'short'	0.111874	0.00539455	0.155605	0.00477182	-0.0415257	0.00408071	3.5997	0.174879	9.49243	0.120275		629.177	61.829	92.805	-0.140992	0.209045	6.04279		-0.140992	0.210939	0.542674		3.33929	0.0567372	0.145618
ALHIC1901	136.915	137.045	'short'	0.124137	0.00539455	0.170673	0.00477182	-0.0550018	0.00408071	2.8784	0.174879	6.61943	0.120275		833.361	61.829	110.572	-1.22078	0.209045	2.84719		-1.22078	0.321422	0.594401		3.63248	0.0877657	0.161975
ALHIC1901	137.515	137.655	'short'	0.115057	0.00539455	0.156953	0.00477182	-0.0508401	0.00408071	2.77755	0.174879	9.56191	0.120275		770.304	61.829	104.893	-0.992394	0.209045	6.08221		-0.992394	0.28826	0.577143		3.57008	0.078463	0.156762
ALHIC1901	139.085	139.215	'short'	0.123868	0.00539455	0.1723	0.00477182	-0.0418611	0.00408071	2.13262	0.174879	8.90889	0.120275		634.259	61.829	93.2227	-2.00249	0.209045	5.09208		-2.00249	0.451772	0.673868		3.84771	0.124698	0.185688
ALHIC1901	139.305	139.395	'short'	0.14885	0.00539455	0.1946	0.00477182	-0.0428054	0.00408071	3.86106	0.174879	8.90889	0.120275		648.566	61.829	94.4063	-0.815996	0.209045	4.59919		-0.815996	0.265205	0.56598		3.52202	0.072012	0.153344
ALHIC1901	139.635	139.725	'short'	0.145189	0.00539455	0.182775	0.00477182	-0.0440939	0.00408071	3.61115	0.174879	9.52824	0.120275		668.089	61.829	96.0394	-0.781249	0.209045	5.47739		-0.781249	0.260986	0.564016		3.51257	0.0708323	0.152736
ALHIC1901	139.835	139.895	'short'	0.116529	0.00539455	0.166092	0.00477182	-0.0471634	0.00408071	2.66799	0.174879	8.33427	0.120275		714.597	61.829	100.008	-1.32057	0.209045	4.65682		-1.32057	0.336833	0.602873		3.65982	0.0921001	0.164518
ALHIC1901	140.075	140.135	'short'	0.130347	0.00539455	0.173004	0.00477182	-0.0414692	0.00408071	3.66504	0.174879	8.9332	0.120275		628.321	61.829	92.7348	-0.493272	0.209045	5.10074		-0.493272	0.231155	0.550847		3.43443	0.0624851	0.148558
ALHIC1901	140.345	140.435	'short'	0.12055	0.00539455	0.162067	0.00477182	-0.0398713	0.00408071	2.08896	0.174879	9.79263	0.120275		604.11	61.829	90.7673	-1.80088	0.209045	6.19895		-1.80088	0.416445	0.650712		3.79196	0.114626	0.178792
ALHIC1901	140.535	140.565	'short'	0.12328	0.00539455	0.162521	0.00477182	-0.0346784	0.00408071	2.89166	0.174879	9.19033	0.120275		525.43	61.829	84.6366	-1.01219	0.209045	5.58874		-1.01219	0.291001	0.578517		3.57548	0.0792307	0.157179
ALHIC1901	140.585	140.655	'short'	0.103138	0.00539455	0.155535	0.00477182	-0.0446181	0.00408071	NaN	0.174879	NaN	0.120275		676.031	61.829	96.7096	NaN	0.209045	NaN
ALHIC1901	140.825	140.865	'short'	0.101801	0.00539455	0.142448	0.00477182	-0.0401403	0.00408071	1.45899	0.174879	9.24922	0.120275		608.186	61.829	91.0961	-1.95866	0.209045	6.09156		-1.95866	0.44402	0.668695		3.83558	0.122484	0.184148
ALHIC1901	140.955	141.055	'short'	0.10918	0.00539455	0.145884	0.00477182	-0.0359419	0.00408071	1.64221	0.174879	8.86467	0.120275		544.574	61.829	86.0884	-1.85837	0.209045	5.63219		-1.85837	0.426429	0.657146		3.80784	0.117468	0.180708
ALHIC1901	141.365	141.445	'short'	0.125098	0.00539455	0.170071	0.00477182	-0.043723	0.00408071	2.55801	0.174879	8.9338	0.120275		662.47	61.829	95.5673	-1.52545	0.209045	5.16618		-1.52545	0.369837	0.621916		3.71606	0.101411	0.17021
ALHIC1901	141.625	141.725	'short'	0.104674	0.00539455	0.154344	0.00477182	-0.0578116	0.00408071	2.42721	0.174879	8.957	0.120275		875.933	61.829	114.484	-1.27887	0.209045	5.53709		-1.27887	0.330334	0.599267		3.64839	0.0902713	0.163436
ALHIC1901	141.865	142.045	'long'	0.0772988	0.00539455	0.151248	0.00477182	-0.0754682	0.00408071	2.41487	0.174879	9.25926	0.120275		1143.46	61.829	140.155	-1.21697	0.209045	5.90684		-1.21697	0.320843	0.594088		3.63144	0.087603	0.161881
ALHIC1901	142.225	142.315	'long'	0.0913382	0.00539455	0.152968	0.00477182	-0.0539604	0.00408071	2.06079	0.174879	9.72674	0.120275		817.582	61.829	109.137	-1.61099	0.209045	6.33468		-1.61099	0.384072	0.630485		3.7396	0.105438	0.172766
ALHIC1901	142.475	142.565	'long'	0.0983627	0.00539455	0.150436	0.00477182	-0.0549846	0.00408071	2.21958	0.174879	9.517	0.120275		833.101	61.829	110.548	-1.39211	0.209045	6.18167		-1.39211	0.348165	0.609277		3.67944	0.0952925	0.166435
ALHIC1901	143.025	143.085	'long'	0.0913351	0.00539455	0.138713	0.00477182	-0.0510346	0.00408071	2.37773	0.174879	8.60015	0.120275		773.251	61.829	105.155	-0.953509	0.209045	5.52713		-0.953509	0.282961	0.574515		3.55947	0.0769795	0.155961
ALHIC1901	143.615	143.745	'long'	0.0345739	0.00539455	0.172854	0.00477182	-0.151747	0.00408071	3.36914	0.174879	10.3699	0.120275		2299.2	61.829	260.36	-0.784341	0.209045	6.53529		-0.784341	0.261357	0.564188		3.51341	0.0709359	0.152789
ALHIC1901	143.745	143.795	'long'	0.125	0.00539455	0.184231	0.00477182	-0.0621343	0.00408071	3.00133	0.174879	9.38316	0.120275		941.428	61.829	120.611	-1.42329	0.209045	5.3007		-1.42329	0.353171	0.612152		3.68799	0.0967042	0.167294
ALHIC1901	144.285	144.415	'long'	0.114418	0.00539455	0.174363	0.00477182	-0.06887	0.00408071	2.87962	0.174879	10.0183	0.120275		1043.49	61.829	130.377	-1.308	0.209045	6.15165		-1.308	0.334865	0.601776		3.65637	0.0915462	0.164189
ALHIC1901	144.415	144.545	'long'	0.0922876	0.00539455	0.183373	0.00477182	-0.0943464	0.00408071	2.97716	0.174879	9.79241	0.120275		1429.49	61.829	168.963	-1.4268	0.209045	5.72727		-1.4268	0.353737	0.612478		3.68896	0.096864	0.167392
ALHIC1901	144.845	144.905	'long'	0.0603764	0.00539455	0.165396	0.00477182	-0.107165	0.00408071	3.1087	0.174879	9.85698	0.120275		1623.71	61.829	189.007	-0.864931	0.209045	6.18937		-0.864931	0.271338	0.56888		3.53534	0.073727	0.154237
ALHIC1901	145.125	145.255	'long'	0.0679654	0.00539455	0.174145	0.00477182	-0.108717	0.00408071	2.85638	0.174879	9.86589	0.120275		1647.22	61.829	191.453	-1.32593	0.209045	6.00464		-1.32593	0.337674	0.603344		3.66129	0.0923368	0.164659
ALHIC1901	145.365	145.465	'long'	0.0926983	0.00539455	0.181483	0.00477182	-0.086431	0.00408071	2.71971	0.174879	9.83724	0.120275		1309.56	61.829	156.76	-1.63784	0.209045	5.81374		-1.63784	0.388588	0.633246		3.74699	0.106718	0.173589
ALHIC1901	146.105	146.225	'long'	0.167413	0.00539455	0.209106	0.00477182	-0.0449089	0.00408071	2.98139	0.174879	9.00068	0.120275		680.437	61.829	97.0828	-2.039	0.209045	4.37008		-2.039	0.458258	0.678233		3.85783	0.126552	0.186989
ALHIC1901	147.205	147.275	'long'	0.174009	0.00539455	0.205377	0.00477182	-0.0364188	0.00408071	3.03909	0.174879	9.33054	0.120275		551.8	61.829	86.6434	-1.89227	0.209045	4.78084		-1.89227	0.432352	0.661005		3.81721	0.119155	0.181857
ALHIC1901	147.505	147.665	'long'	0.179189	0.00539455	0.21402	0.00477182	-0.0382117	0.00408071	3.29414	0.174879	9.61194	0.120275		578.965	61.829	88.7623	-1.8455	0.209045	4.86991		-1.8455	0.424188	0.655694		3.80428	0.11683	0.180276
ALHIC1901	150.945	150.985	'long'	0.132455	0.00539455	0.195076	0.00477182	-0.0764171	0.00408071	3.35229	0.174879	9.35667	0.120275		1157.83	61.829	141.576	-1.33379	0.209045	5.03455		-1.33379	0.33891	0.604036		3.66344	0.0926849	0.164866
ALHIC1901	147.805	147.895	'long'	0.165169	0.00539455	0.203198	0.00477182	-0.0396959	0.00408071	3.53264	0.174879	9.37683	0.120275		601.453	61.829	90.5535	-1.34892	0.209045	4.87508		-1.34892	0.341297	0.605379		3.66759	0.0933573	0.165268
ALHIC1901	148.435	148.505	'long'	-0.00270925	0.00539455	0.173732	0.00477182	-0.176518	0.00408071	3.88978	0.174879	10.6864	0.120275		2674.51	61.829	300.623	-0.286915	0.209045	6.83115		-0.286915	0.216778	0.54497		3.37864	0.0584289	0.14654
ALHIC1901	148.645	148.735	'long'	0.0449264	0.00539455	0.174807	0.00477182	-0.133029	0.00408071	3.62745	0.174879	10.9723	0.120275		2015.6	61.829	230.175	-0.573959	0.209045	7.09217		-0.573959	0.238489	0.553965		3.45629	0.0645403	0.149571
ALHIC1901	148.815	148.865	'long'	0.0384401	0.00539455	0.164149	0.00477182	-0.130926	0.00408071	3.57148	0.174879	10.0096	0.120275		1983.72	61.829	226.8	-0.374055	0.209045	6.3691		-0.374055	0.222028	0.54708		3.40218	0.0599177	0.14729
ALHIC1901	149.415	149.525	'long'	0.0318201	0.00539455	0.170475	0.00477182	-0.137308	0.00408071	3.3177	0.174879	10.2929	0.120275		2080.42	61.829	237.051	-0.778541	0.209045	6.51123		-0.778541	0.260663	0.563866		3.51184	0.0707417	0.152689
ALHIC1901	149.685	149.835	'long'	0.120852	0.00539455	0.194135	0.00477182	-0.0715378	0.00408071	2.48209	0.174879	9.15074	0.120275		1083.91	61.829	134.308	-2.17741	0.209045	4.85029		-2.17741	0.483057	0.695229		3.89622	0.133658	0.192054
ALHIC1901	150.195	150.275	'long'	0.117296	0.00539455	0.184874	0.00477182	-0.0632635	0.00408071	2.5997	0.174879	9.02245	0.120275		958.538	61.829	122.23	-1.83854	0.209045	4.92725		-1.83854	0.422977	0.654912		3.80236	0.116485	0.180043
ALHIC1901	147.665	147.765	'long'	0.133988	0.00539455	0.179873	0.00477182	-0.0528179	0.00408071	3.18461	0.174879	8.93113	0.120275		800.271	61.829	107.574	-1.13638	0.209045	4.94682		-1.13638	0.308795	0.587669		3.6094	0.0842197	0.159948
ALHIC1901	151.255	151.385	'long'	0.173072	0.00539455	0.216374	0.00477182	-0.0447702	0.00408071	3.66459	0.174879	10.3699	0.120275		678.337	61.829	96.9048	-1.53334	0.209045	5.57224		-1.53334	0.37114	0.622691		3.71823	0.101779	0.170442
ALHIC1901	151.155	151.255	'long'	0.186895	0.00539455	0.224959	0.00477182	-0.0368423	0.00408071	3.36611	0.174879	9.37892	0.120275		558.216	61.829	87.1392	-2.03588	0.209045	4.3963		-2.03588	0.457704	0.677859		3.85696	0.126394	0.186877
ALHIC1901	151.945	152.075	'long'	0.0180917	0.00539455	0.14206	0.00477182	-0.132586	0.00408071	2.1047	0.174879	9.02494	0.120275		2008.88	61.829	229.464	-1.30586	0.209045	5.87656		-1.30586	0.33453	0.60159		3.65578	0.091452	0.164133
ALHIC1901	152.265	152.415	'long'	0.0214775	0.00539455	0.114849	0.00477182	-0.0994739	0.00408071	2.64432	0.174879	7.96494	0.120275		1507.18	61.829	176.944	-0.115369	0.209045	5.4215		-0.115369	0.210315	0.542432		3.33239	0.0565487	0.145499
ALHIC1901	152.665	152.805	'long'	0.0239002	0.00539455	0.145055	0.00477182	-0.121928	0.00408071	2.73554	0.174879	8.60015	0.120275		1847.39	61.829	212.411	-0.748983	0.209045	5.38686		-0.748983	0.257175	0.562262		3.5038	0.0697666	0.152191
ALHIC1901	153.035	153.135	'long'	0.00248309	0.00539455	0.175922	0.00477182	-0.172028	0.00408071	2.66246	0.174879	8.95177	0.120275		2606.48	61.829	293.304	NaN	0.209045	5.05472
ALHIC1901	153.865	153.975	'long'	0.085394	0.00539455	0.144404	0.00477182	-0.0593064	0.00408071	3.78669	0.174879	8.95177	0.120275		898.581	61.829	116.589	0.314136	0.209045	5.75175
ALHIC1901	154.665	154.755	'long'	0.0968686	0.00539455	0.151342	0.00477182	-0.0558537	0.00408071	2.54374	0.174879	8.4595	0.120275		846.268	61.829	111.752	-1.09083	0.209045	5.10764		-1.09083	0.302153	0.584206		3.59695	0.0823565	0.158903
ALHIC1901	154.755	154.845	'long'	0.0923943	0.00539455	0.145727	0.00477182	-0.0588092	0.00408071	2.47287	0.174879	8.3028	0.120275		891.048	61.829	115.887	-1.02685	0.209045	5.0756		-1.02685	0.293047	0.579548		3.57948	0.0798039	0.157492
ALHIC1901	157.175	157.265	'long'	0.0109466	0.00539455	0.130583	0.00477182	-0.120993	0.00408071	2.26983	0.174879	7.84922	0.120275		1833.23	61.829	210.922	-0.866154	0.209045	4.95819		-0.866154	0.271494	0.568954		3.53567	0.0737706	0.15426
ALHIC1901	158.745	158.805	'long'	-0.00556551	0.00539455	0.165978	0.00477182	-0.177171	0.00408071	4.6188	0.174879	12.8657	0.120275		2684.4	61.829	301.688	0.62521	0.209045	9.17425		0.62521	0.243589	0.556179		3.13402	0.0647898	0.147608
ALHIC1901	158.895	158.925	'long'	-0.0147663	0.00539455	0.176149	0.00477182	-0.202289	0.00408071	4.46609	0.174879	14.1242	0.120275		3064.98	61.829	342.77	0.228962	0.209045	10.2021		0.228962	0.214002	0.543872		3.23989	0.0572543	0.145167
ALHIC1901	159.405	159.545	'long'	0.0194961	0.00539455	0.191144	0.00477182	-0.182512	0.00408071	2.84579	0.174879	15.553	0.120275		2765.33	61.829	310.407	-1.74375	0.209045	11.2918				0.644458
ALHIC1901	159.675	159.755	'long'	0.346411	0.00539455	0.601911	0.00477182	-0.263188	0.00408071	-0.435207	0.174879	117.121	0.120275		3987.7	61.829	442.983	-14.7667	0.209045	102.43				3.00265
ALHIC1901	121.925	122.025	'short'	0.0895192	0.00518154	0.122125	0.00553876	-0.0300983	0.00391664	1.75846	0.108234	8.96769	0.17941		456.035	59.3431	77.7046	-1.17323	0.171427	6.26064		-1.17323	0.290595	0.578313		3.61947	0.0793101	0.157499
ALHIC1901	123.325	123.375	'short'	0.0859099	0.00518154	0.120887	0.00553876	-0.0368585	0.00391664	0.752101	0.108234	8.3667	0.17941		558.463	59.3431	85.4128	-2.14699	0.171427	5.68865		-2.14699	0.462354	0.681007		3.88778	0.12789	0.188059
ALHIC1901	128.135	128.195	'short'	0.109897	0.00518154	0.157617	0.00553876	-0.0401009	0.00391664	3.81435	0.108234	9.65847	0.17941		607.59	59.3431	89.3784	0.0245903	0.171427	6.16375		0.0245903	0.171498	0.528594		3.29473	0.0460316	0.141517
ALHIC1901	129.805	129.855	'short'	0.0991032	0.00518154	0.141588	0.00553876	-0.0382994	0.00391664	2.14518	0.108234	9.15624	0.17941		580.294	59.3431	87.156	-1.25421	0.171427	6.01788		-1.25421	0.303824	0.585072		3.64163	0.0830126	0.159523
ALHIC1901	143.795	143.875	'long'	0.0891921	0.00518154	0.173991	0.00553876	-0.0842866	0.00391664	2.7783	0.108234	9.84327	0.17941		1277.07	59.3431	152.498	-1.39998	0.171427	5.98552		-1.39998	0.328307	0.598152		3.6816	0.0898815	0.163428
ALHIC1901	148.435	148.505	'long'	-0.0274973	0.00518154	0.165701	0.00553876	-0.189266	0.00391664	4.21438	0.108234	12.3693	0.17941		2867.67	59.3431	320.978	0.229055	0.171427	8.68579		0.229055	0.177443	0.530553		3.23987	0.0474856	0.141625
ALHIC1901	153.035	153.135	'long'	-0.0137833	0.00518154	0.132154	0.00553876	-0.143335	0.00391664	2.90411	0.108234	9.13418	0.17941		2171.74	59.3431	246.152	-0.271558	0.171427	6.20468		-0.271558	0.179825	0.531354		3.37449	0.0484711	0.142861
ALHIC1901	153.865	153.975	'long'	0.0847811	0.00518154	0.134794	0.00553876	-0.0564132	0.00391664	1.75741	0.108234	8.53265	0.17941		854.745	59.3431	111.183	-1.47788	0.171427	5.54651		-1.47788	0.341691	0.605601		3.70299	0.0936458	0.165647
ALHIC1901	154.845	154.945	'long'	0.0839768	0.00518154	0.168765	0.00553876	-0.0767723	0.00391664	2.5042	0.108234	9.11939	0.17941		1163.22	59.3431	141.045	-1.54773	0.171427	5.37997		-1.54773	0.353845	0.612541		3.72219	0.0970698	0.167712
ALHIC1901	154.945	155.065	'long'	0.043504	0.00518154	0.136672	0.00553876	-0.0907415	0.00391664	2.10015	0.108234	8.26105	0.17941		1374.87	59.3431	162.462	-1.18126	0.171427	5.23418		-1.18126	0.291895	0.578967		3.62167	0.0796736	0.157695
ALHIC1901	155.355	155.435	'long'	0.0258053	0.00518154	0.128403	0.00553876	-0.105795	0.00391664	2.65007	0.108234	8.34355	0.17941		1602.95	59.3431	186.043	-0.434816	0.171427	5.49932		-0.434816	0.192224	0.535677		3.41861	0.0519317	0.14436
ALHIC1901	155.585	155.665	'long'	-0.0239761	0.00518154	0.104476	0.00553876	-0.123536	0.00391664	2.29044	0.108234	7.71572	0.17941		1871.76	59.3431	214.275	-0.219439	0.171427	5.4023		-0.219439	0.176956	0.53039		3.36043	0.0476626	0.142495
ALHIC1901	155.665	155.815	'long'	-0.0215315	0.00518154	0.10552	0.00553876	-0.127159	0.00391664	2.17614	0.108234	7.8917	0.17941		1926.66	59.3431	220.084	-0.358514	0.171427	5.55477		-0.358514	0.185819	0.533412		3.39798	0.0501478	0.143592
ALHIC1901	155.815	156.055	'long'	-0.0130439	0.00518154	0.108253	0.00553876	-0.123514	0.00391664	2.0905	0.108234	7.58715	0.17941		1871.43	59.3431	214.24	-0.509491	0.171427	5.19049		-0.509491	0.199426	0.538303		3.43882	0.0539334	0.145222
ALHIC1901	156.325	156.445	'long'	0.0405525	0.00518154	0.134247	0.00553876	-0.0937992	0.00391664	1.88802	0.108234	8.27032	0.17941		1421.2	59.3431	167.216	-1.33457	0.171427	5.29706		-1.33457	0.317223	0.592141		3.66366	0.0867692	0.161635
ALHIC1901	156.445	156.655	'long'	0.0270198	0.00518154	0.130991	0.00553876	-0.100406	0.00391664	2.16787	0.108234	7.54426	0.17941		1521.3	59.3431	177.553	-0.977567	0.171427	4.64509		-0.977567	0.260025	0.563571		3.56603	0.0707767	0.153057
ALHIC1901	156.825	156.895	'long'	0.0095365	0.00518154	0.124382	0.00553876	-0.110516	0.00391664	2.39709	0.108234	8.03145	0.17941		1674.49	59.3431	193.517	-0.590595	0.171427	5.277		-0.590595	0.208181	0.541608		3.4608	0.0563646	0.146283
ALHIC1901	157.075	157.175	'long'	0.00344173	0.00518154	0.122541	0.00553876	-0.113017	0.00391664	2.96166	0.108234	7.99777	0.17941		1712.38	59.3431	197.488	0.016482	0.171427	5.28414		0.016482	0.171459	0.528581		3.29691	0.0460265	0.14153
ALHIC1901	157.345	157.425	'long'	0.0481799	0.00518154	0.143324	0.00553876	-0.0913634	0.00391664	2.2244	0.108234	8.49547	0.17941		1384.29	59.3431	163.427	-1.21686	0.171427	5.32079		-1.21686	0.297686	0.581908		3.63141	0.081294	0.158576
ALHIC1901	157.595	157.665	'long'	-0.0317745	0.00518154	0.109357	0.00553876	-0.145646	0.00391664	2.57523	0.108234	7.83854	0.17941		2206.76	59.3431	249.892	-0.0524966	0.171427	5.41688		-0.0524966	0.171749	0.528675		3.31546	0.0461501	0.141695
ALHIC1901	158.925	159.115	'long'	-0.0271707	0.00518154	0.168092	0.00553876	-0.190806	0.00391664	5.08066	0.108234	15.3615	0.17941		2891	59.3431	323.499	1.03446	0.171427	11.6139		1.03446	0.268684	0.567619		3.02529	0.0710421	0.149771
ALHIC1901	159.115	159.295	'long'	-0.0249116	0.00518154	0.165304	0.00553876	-0.1911	0.00391664	5.35628	0.108234	15.0742	0.17941		2895.46	59.3431	323.982	1.37596	0.171427	11.3897		1.37596	0.324219	0.595918		2.93504	0.0852866	0.156465
ALHIC1901	159.405	159.545	'long'	0.0359692	0.00518154	0.220389	0.00553876	-0.185524	0.00391664	3.54403	0.108234	17.9341	0.17941		2810.98	59.3431	314.851	-1.74946	0.171427	13.0111				0.633886
ALHIC1901	159.5	159.675	'long'	0.108515	0.00518154	0.302146	0.00553876	-0.198252	0.00391664	4.07627	0.108234	31.9152	0.17941		3003.82	59.3431	335.707	-3.17736	0.171427	25.0797				0.826566
ALHIC1901	119.695	119.895	'short'	0.245859	0.00436389	0.273672	0.00636666	-0.0287184	0.00351346	6.28089	0.0959638	11.7958	0.155314		435.127	53.2343	71.588	-0.305932	0.180445	5.72317		-0.305932	0.190536	0.535074		3.38377	0.0513799	0.143928
ALHIC1901	130.655	130.755	'short'	0.129116	0.00630083	0.173937	0.00636666	-0.0447242	0.00351346	2.72605	0.0959638	10.3218	0.155314		677.639	53.2343	91.5978	-1.45073	0.180445	6.46343		-1.45073	0.34168	0.605595		3.69553	0.0936044	0.165578
ALHIC1901	128.915	129.075	'short'	0.0784213	0.00493554	0.125276	0.00636666	-0.038988	0.00351346	1.40319	0.0959638	9.06691	0.155314		590.727	53.2343	84.0017	-1.60294	0.180445	6.28986		-1.60294	0.367881	0.620755		3.73738	0.100993	0.170092
ALHIC1901	133.635	133.685	'short'	0.0891633	0.00816268	0.133019	0.00636666	-0.0528181	0.00351346	2.02375	0.0959638	9.43981	0.155314		800.274	53.2343	102.875	-1.16986	0.180445	6.49027		-1.16986	0.295471	0.580778		3.61855	0.080634	0.158159
ALHIC1901	132.335	132.425	'short'	0.0724185	0.0055274	0.131145	0.00636666	-0.0575887	0.00351346	2.03483	0.0959638	9.50128	0.155314		872.556	53.2343	109.755	-1.1139	0.180445	6.59306		-1.1139	0.28669	0.57636		3.60325	0.0781774	0.156831
ALHIC1901	124.905	124.955	'short'	0.0687757	0.00543585	0.126259	0.00636666	-0.0545514	0.00351346	1.5719	0.0959638	8.78463	0.155314		826.536	53.2343	105.357	-1.45829	0.180445	5.9866		-1.45829	0.342964	0.60632		3.69761	0.093966	0.165795
ALHIC1901	131.565	131.605	'short'	0.0935393	0.00722823	0.139653	0.00636666	-0.0520094	0.00351346	2.39389	0.0959638	9.42702	0.155314		788.021	53.2343	101.724	-0.959952	0.180445	6.33065		-0.959952	0.263478	0.565173		3.56123	0.0716961	0.15345
ALHIC1901	158.805	158.895	'long'	0.000281893	0.00600061	0.187532	0.00636666	-0.188	0.00351346	5.00747	0.0959638	14.1306	0.155314		2848.48	53.2343	317.823	0.49475	0.180445	9.95557		0.49475	0.205794	0.540695		3.16881	0.0548533	0.143778
ALHIC1902	134.71	134.83	'long'	0.109038	0.00723692	0.150963	0.00829762	-0.032966	0.00686517	2.53344	0.16205	9.93693	0.246293		499.485	104.018	117.637	-0.87018	0.25676	7.21244		-0.87018	0.310184	0.5884		3.53677	0.0842647	0.159519
ALHIC1902	192.08	192.22	'long'	-0.033561	0.00518154	0.136064	0.00553876	-0.169995	0.00391664	3.55862	0.108234	10.1579	0.17941		2575.68	59.3431	289.473	0.287025	0.171427	7.13884		0.287025	0.180783	0.531679		3.22434	0.0483383	0.141807
ALHIC1902	202.4	202.59	'long'	0.132271	0.00518154	0.430648	0.00553876	-0.300157	0.00391664	-26.6478	0.108234	76.2688	0.17941		4547.83	59.3431	503.769	-36.654	0.171427	66.1222
ALHIC1902	203.27	203.44	'long'	0.0938532	0.00518154	0.3756	0.00553876	-0.285087	0.00391664	-19.4984	0.108234	57.3891	0.17941		4319.5	59.3431	478.836	-28.2957	0.171427	48.6893
ALHIC1902	203.44	203.56	'long'	0.0906907	0.00518154	0.38194	0.00553876	-0.288611	0.00391664	-17.6336	0.108234	54.9707	0.17941		4372.89	59.3431	484.664	-26.5957	0.171427	46.1449
ALHIC1902	204.03	204.11	'long'	0.196039	0.00518154	0.503403	0.00553876	-0.305326	0.00391664	-27.0647	0.108234	69.8832	0.17941		4626.16	59.3431	512.326	-38.7458	0.171427	58.1027
ALHIC1902	206.36	206.53	'long'	NaN	NaN	NaN	NaN	NaN	NaN	NaN	NaN	NaN	NaN		NaN	NaN	NaN	NaN	NaN	NaN
ALHIC1902	147.87	148.07	'long'	0.101408	0.00428424	0.151014	0.00636666	-0.056341	0.00351346	2.52761	0.0959638	8.43123	0.155314		853.652	53.2343	107.942	-1.09903	0.180445	5.08672		-1.09903	0.284386	0.575217		3.59919	0.0775333	0.156487
ALHIC1902	157.08	157.31	'long'	0.0950988	0.00166638	0.146013	0.00636666	-0.0529679	0.00351346	2.31627	0.0959638	8.24754	0.155314		802.544	53.2343	103.088	-1.18975	0.180445	5.01419		-1.18975	0.298632	0.582392		3.62399	0.0815187	0.158644
ALHIC1902	160.29	160.59	'long'	0.0837514	0.0101539	0.149433	0.00636666	-0.0680805	0.00351346	2.19787	0.0959638	8.65378	0.155314		1031.52	53.2343	125.335	-1.3897	0.180445	5.3435		-1.3897	0.331376	0.599842		3.67877	0.0907057	0.163863
ALHIC1902	142.11	142.32	'long'	0.0947418	0.00353528	0.157049	0.00636666	-0.0662344	0.00351346	2.46406	0.0959638	9.49258	0.155314		1003.55	53.2343	122.556	-1.307	0.180445	6.01099		-1.307	0.317633	0.59236		3.6561	0.086845	0.161629
ALHIC1902	145.06	145.21	'long'	0.102093	0.00670365	0.145827	0.00636666	-0.0437732	0.00351346	2.33301	0.0959638	8.52881	0.155314		663.231	53.2343	90.3127	-1.16861	0.180445	5.29867		-1.16861	0.295273	0.580678		3.61821	0.0805786	0.158129
ALHIC1902	166.58	166.75	'long'	0.0837667	0.0050544	0.163114	0.00636666	-0.0793156	0.00351346	3.49016	0.0959638	9.97732	0.155314		1201.75	53.2343	142.509	-0.430248	0.180445	6.35979		-0.430248	0.199912	0.538484		3.41737	0.0540022	0.145103
ALHIC1902	184.2	184.45	'long'	-0.0041172	0.00337633	0.153811	0.00636666	-0.169064	0.00351346	3.56677	0.0959638	11.0103	0.155314		2561.57	53.2343	286.758	-0.130744	0.180445	7.59524		-0.130744	0.182329	0.532207		3.33653	0.0490449	0.142799
ALHIC1902	177.31	177.5	'long'	0.0943722	0.00386392	0.151298	0.00636666	-0.062316	0.00351346	2.57577	0.0959638	9.02498	0.155314		944.182	53.2343	116.708	-1.05787	0.180445	5.67221		-1.05787	0.278072	0.572122		3.58795	0.0757691	0.155554
ALHIC1902	205.45	205.85	'long'	1.22057	0.0125624	1.63313	0.0246315	-0.395471	0.024244	NaN	NaN	NaN	NaN		5991.99	367.333	754.567	NaN	NaN	NaN
ALHIC1902	204.98	205.05	'long'	0.621019	0.0307149	0.946296	0.0222724	-0.375452	0.0311787	-103.924	1.16235	140.737	0.211756		5688.67	472.404	784.049	NaN	NaN	117.245
ALHIC1902	204.67	204.76	'long'	0.377309	0.0139409	0.768238	0.0268442	-0.351592	0.0401252	-95.6205	1.89392	98.5703	0.0567146		5327.16	607.957	844.389	NaN	NaN	80.1661
ALHIC1902	200.92	201.03	'long'	0.0924217	0.0249561	0.327628	0.0195504	-0.244379	0.0227832	-75.9353	0.128462	21.3323	0.125485		3702.72	345.2	533.906	NaN	NaN	13.9984
ALHIC1903	77.47	77.57	'short'	0.294851	0.00349463	0.294187	0.00478325	-0.0070647	0.00411758	7.31905	0.305932	9.10013	0.161019		107.041	62.3875	63.4889	0.232968	0.326763	2.59116		0.232968	0.330068	0.59912		3.23882	0.0882286	0.159841
ALHIC1903	112.81	113.05	'short'	0.307717	0.00349463	0.312963	0.00478325	-0.00883593	0.00411758	7.11203	0.305932	11.2897	0.161019		133.878	62.3875	64.1021	-0.438124	0.326763	4.42156		-0.438124	0.338308	0.603699		3.4195	0.0913055	0.162619
ALHIC1903	112.81	113.05	'short'	0.308133	0.00349463	0.311332	0.00478325	-0.00552747	0.00411758	7.15576	0.305932	11.7751	0.161019		83.7496	62.3875	63.064	-0.340479	0.326763	4.86989		-0.340479	0.333783	0.601175		3.3931	0.0899594	0.161713
ALHIC1903	121.27	121.37	'short'	0.312262	0.00349463	0.292821	0.00478325	0.00572513	0.00411758	6.26563	0.305932	12.8548	0.161019		-86.7444	62.3875	63.113	-0.780289	0.326763	6.35188		-0.780289	0.362116	0.617356		3.51231	0.0982048	0.167113
ALHIC1903	121.27	121.37	'short'	0.302729	0.00349463	0.302421	0.00478325	-0.00954902	0.00411758	6.34212	0.305932	13.1835	0.161019		144.682	62.3875	64.3855	-0.934487	0.326763	6.46587		-0.934487	0.376437	0.625863		3.55429	0.10231	0.169789
ALHIC1903	130.89	131.17	'short'	0.200575	0.00349463	0.211018	0.00478325	-0.0107787	0.00411758	2.97028	0.305932	9.56624	0.161019		163.314	62.3875	64.9225	-2.09582	0.326763	4.89079		-2.09582	0.531481	0.729707		3.87358	0.146819	0.201276
ALHIC1903	134.99	135.14	'short'	0.162489	0.00349463	0.177849	0.00478325	-0.0143074	0.00411758	2.12383	0.305932	9.49538	0.161019		216.779	62.3875	66.7894	-2.14412	0.326763	5.55361		-2.14412	0.539134	0.735299		3.88698	0.149035	0.202959
ALHIC1903	136.72	136.87	'short'	0.175095	0.00349463	0.180003	0.00478325	-0.00418103	0.00411758	1.91163	0.305932	8.8754	0.161019		63.349	62.3875	62.7755	-2.40699	0.326763	4.88844		-2.40699	0.581823	0.767149		3.9601	0.161433	0.212552
ALHIC1903	138.43	138.5	'short'	0.197781	0.00349463	0.202474	0.00478325	-0.00357352	0.00411758	2.18099	0.305932	9.79999	0.161019		54.1442	62.3875	62.6712	-2.67669	0.326763	5.31236		-2.67669	0.627185	0.802098		4.03542	0.174685	0.223101
ALHIC1903	143.5	143.76	'short'	0.213199	0.00349463	0.216413	0.00478325	-0.00550462	0.00411758	2.741	0.305932	9.31978	0.161019		83.4033	62.3875	63.0585	-2.45308	0.326763	4.52627		-2.45308	0.589473	0.772967		3.97295	0.163662	0.214306
ALHIC1903	136.72	136.82	'short'	0.174717	0.00539455	0.177348	0.00477182	-0.00565649	0.00408071	2.11338	0.174879	8.32424	0.120275		85.7043	61.829	62.5436	-2.14252	0.209045	4.39812		-2.14252	0.476777	0.690881		3.88654	0.131856	0.190758
ALHIC1903	134.99	135.14	'short'	0.169648	0.00539455	0.177756	0.00477182	-0.00822729	0.00408071	1.64867	0.174879	9.79056	0.120275		124.656	61.829	63.3312	-2.61502	0.209045	5.8497		-2.61502	0.563235	0.753149		4.01817	0.156801	0.209365
ALHIC1903	77.47	77.57	'short'	0.295994	0.00539455	0.307032	0.00477182	-0.0106484	0.00408071	7.20521	0.174879	8.05358	0.120275		161.34	61.829	64.3257	-0.18825	0.209045	1.26845		-0.18825	0.212409	0.543247		3.35202	0.0571711	0.14587
ALHIC1502	35.27	NaN	'short'	NaN	NaN	NaN	NaN	-0.023	0.006	NaN	NaN	NaN	NaN		350	90.9091	98.7254	-0.26	0.254635	NaN		-0.26	0.25989	0.563509		3.37137	0.0699998	0.151446
ALHIC1502	79.02	NaN	'short'	NaN	NaN	NaN	NaN	-0.038	0.006	NaN	NaN	NaN	NaN		570	90.9091	110.434	-2.76	0.254635	NaN		-2.76	0.6079	0.78711		4.05876	0.169558	0.21924
ALHIC1502	115.45	NaN	'short'	NaN	NaN	NaN	NaN	-0.035	0.006	NaN	NaN	NaN	NaN		530	90.9091	107.997	-0.32	0.254635	NaN		-0.32	0.262554	0.564743		3.38757	0.0707777	0.151908
ALHIC1502	142.91	NaN	'short'	NaN	NaN	NaN	NaN	-0.035	0.006	NaN	NaN	NaN	NaN		530	90.9091	107.997	-0.19	0.254635	NaN		-0.19	0.257455	0.56239		3.35249	0.0692747	0.150993
ALHIC1502	171.73	NaN	'short'	NaN	NaN	NaN	NaN	-0.05	0.006	NaN	NaN	NaN	NaN		750	90.9091	122.763	-1.19	0.254635	NaN		-1.19	0.348544	0.609494		3.62406	0.0951085	0.165994
ALHIC1502	174.2	NaN	'short'	NaN	NaN	NaN	NaN	-0.042	0.006	NaN	NaN	NaN	NaN		640	90.9091	114.981	-2.12	0.254635	NaN		-2.12	0.494586	0.703289		3.88029	0.136716	0.194099
ALHIC1502	177.23	NaN	'long'	NaN	NaN	NaN	NaN	-0.091	0.006	NaN	NaN	NaN	NaN		1380	90.9091	176.94	-1.05	0.254635	NaN		-1.05	0.330059	0.599115		3.5858	0.0898895	0.162842
ALHIC1502	180.77	NaN	'long'	NaN	NaN	NaN	NaN	-0.028	0.006	NaN	NaN	NaN	NaN		430	90.9091	102.478	-1.99	0.254635	NaN		-1.99	0.472486	0.687926		3.84425	0.13037	0.189506
ALHIC1502	182.2	NaN	'long'	NaN	NaN	NaN	NaN	-0.033	0.006	NaN	NaN	NaN	NaN		500	90.9091	106.252	-2.09	0.254635	NaN		-2.09	0.489452	0.699688		3.87197	0.13524	0.193022
ALHIC1502	184.49	NaN	'long'	NaN	NaN	NaN	NaN	-0.125	0.006	NaN	NaN	NaN	NaN		1900	90.9091	227.915	-0.97	0.254635	NaN		-0.97	0.320117	0.593696		3.56397	0.087085	0.161185
ALHIC1502	186.67	NaN	'long'	NaN	NaN	NaN	NaN	-0.149	0.006	NaN	NaN	NaN	NaN		2260	90.9091	264.701	-0.53	0.254635	NaN		-0.53	0.275817	0.57103		3.44438	0.0745736	0.15406
ALHIC1502	190	NaN	'long'	NaN	NaN	NaN	NaN	-0.058	0.006	NaN	NaN	NaN	NaN		880	90.9091	132.796	-0.92	0.254635	NaN		-0.92	0.314157	0.590504		3.55034	0.0854043	0.160204
ALHIC1503	126.98	NaN	'short'	NaN	NaN	NaN	NaN	-0.049	0.006	NaN	NaN	NaN	NaN		740	90.9091	122.026	-1.1	0.254635	NaN		-1.1	0.33651	0.602693		3.59945	0.09171	0.163931
ALHIC1503	132.07	NaN	'long'	NaN	NaN	NaN	NaN	-0.102	0.006	NaN	NaN	NaN	NaN		1550	90.9091	193.222	-0.98	0.254635	NaN		-0.98	0.321333	0.594352		3.5667	0.0874279	0.161386
ALHIC1503	137.05	NaN	'long'	NaN	NaN	NaN	NaN	-0.093	0.006	NaN	NaN	NaN	NaN		1410	90.9091	179.779	-0.73	0.254635	NaN		-0.73	0.293521	0.579789		3.49864	0.0795833	0.156871
ALHIC1503	139.11	NaN	'long'	NaN	NaN	NaN	NaN	-0.045	0.006	NaN	NaN	NaN	NaN		680	90.9091	117.726	-2.37	0.254635	NaN		-2.37	0.538066	0.734517		3.94979	0.149257	0.203445
ALHIC1503	141.32	NaN	'long'	NaN	NaN	NaN	NaN	-0.13	0.006	NaN	NaN	NaN	NaN		1970	90.9091	234.996	-1.12	0.254635	NaN		-1.12	0.339138	0.604165		3.60492	0.0924521	0.164378
ALHIC1503	143.75	NaN	'long'	NaN	NaN	NaN	NaN	-0.106	0.006	NaN	NaN	NaN	NaN		1610	90.9091	199.07	-0.43	0.254635	NaN		-0.43	0.268765	0.567657		3.41731	0.0725649	0.152932
ALHIC1503	145.4	NaN	'long'	NaN	NaN	NaN	NaN	-0.133	0.006	NaN	NaN	NaN	NaN		2010	90.9091	239.06	-0.63	0.254635	NaN		-0.63	0.284104	0.575078		3.47149	0.0769221	0.155374
ALHIC1503	146.48	NaN	'long'	NaN	NaN	NaN	NaN	-0.178	0.006	NaN	NaN	NaN	NaN		2690	90.9091	309.55	-0.31	0.254635	NaN		-0.31	0.262074	0.56452		3.38487	0.0706382	0.151826

## Sheet: Data_all
Core	Sample ID	top depth	bottom depth		d4038Ar	d4038 err	d3836Ar	d3836 err	d40Ar atm	d40Ar atm err	dXeKr	dXeKr err	dKrAr	dKrAr err		d18Oice UMaine	dDice Umaine	d18Oice UWcorrection	dDice UWcorrection		d18Oatm		Argon Age	Age err	Age Abs err	dXeKrgravcorr	dXeXrgravcorr err	dKrArgravcorr		MOT	MOT err	MOT abs err		Benthic T component	Benthic T err	Benthic T abs err
ALHIC1901	CMC1_200_1	134.465	134.525	'short'	0.106849	0.00539455	0.161073	0.00477182	-0.0566158	0.00408071	2.88641	0.174879	10.4149	0.120275		-37.7237	-307.209	-37.9617	-303.053		0.159215		857.814	61.829	112.812	-0.982694	0.209045	6.84101		-0.982694	0.286928	0.576478		3.56743	0.0780899	0.156559
ALHIC1901	CMC1_201_1	135.195	135.355	'short'	0.123546	0.00539455	0.173132	0.00477182	-0.0515601	0.00408071	2.83015	0.174879	8.93386	0.120275		-36.2039	-294.922	-36.4553	-290.896		-0.00474525		781.213	61.829	105.865	-1.32778	0.209045	5.09857		-1.32778	0.337964	0.603506		3.66179	0.0924185	0.164707
ALHIC1901	CMC1_202_1	136.185	136.315	'short'	0.10138	0.00539455	0.154252	0.00477182	-0.0512311	0.00408071	3.23616	0.174879	9.48851	0.120275		-37.429	-306.071	-37.6697	-301.927		0.138836		776.229	61.829	105.42	-0.470724	0.209045	6.06884		-0.470724	0.229267	0.550057		3.42833	0.0619551	0.148297
ALHIC1901	CMC1_202_3B	136.575	136.665	'short'	0.126299	0.00539455	0.174327	0.00477182	-0.0515659	0.00408071	7.86987	0.174879	21.6592	0.120275		NaN	NaN	NaN	NaN		NaN		781.302	61.829	105.873	NaN	0.209045	17.7488		NaN	NaN	NaN		NaN	NaN	NaN
ALHIC1901	CMC1_202_3B	136.575	136.665	'short'	0.111874	0.00539455	0.155605	0.00477182	-0.0415257	0.00408071	3.5997	0.174879	9.49243	0.120275		-37.3708	-304.74	-37.6119	-300.609		0.178284		629.177	61.829	92.805	-0.140992	0.209045	6.04279		-0.140992	0.210939	0.542674		3.33929	0.0567372	0.145618
ALHIC1901	CMC1_203_1	136.915	137.045	'short'	0.124137	0.00539455	0.170673	0.00477182	-0.0550018	0.00408071	2.8784	0.174879	6.61943	0.120275		-37.3955	-305.701	-37.6365	-301.56		0.182521		833.361	61.829	110.572	-1.22078	0.209045	2.84719		-1.22078	0.321422	0.594401		3.63248	0.0877657	0.161975
ALHIC1901	CMC1_203_4	137.515	137.655	'short'	0.115057	0.00539455	0.156953	0.00477182	-0.0508401	0.00408071	2.77755	0.174879	9.56191	0.120275		-37.4962	-305.599	-37.7362	-301.46		0.156929		770.304	61.829	104.893	-0.992394	0.209045	6.08221		-0.992394	0.28826	0.577143		3.57008	0.078463	0.156762
ALHIC1901	CMC1_207_2	139.085	139.215	'short'	0.123868	0.00539455	0.1723	0.00477182	-0.0418611	0.00408071	2.13262	0.174879	8.90889	0.120275		-36.139	-294.242	-36.391	-290.223		0.105269		634.259	61.829	93.2227	-2.00249	0.209045	5.09208		-2.00249	0.451772	0.673868		3.84771	0.124698	0.185688
ALHIC1901	CMC1_207_4	139.305	139.395	'short'	0.14885	0.00539455	0.1946	0.00477182	-0.0428054	0.00408071	3.86106	0.174879	8.90889	0.120275		-36.2175	-294.033	-36.4687	-290.017		0.180287		648.566	61.829	94.4063	-0.815996	0.209045	4.59919		-0.815996	0.265205	0.56598		3.52202	0.072012	0.153344
ALHIC1901	CMC1_207_8	139.635	139.725	'short'	0.145189	0.00539455	0.182775	0.00477182	-0.0440939	0.00408071	3.61115	0.174879	9.52824	0.120275		-35.8748	-292.839	-36.1291	-288.834		0.344		668.089	61.829	96.0394	-0.781249	0.209045	5.47739		-0.781249	0.260986	0.564016		3.51257	0.0708323	0.152736
ALHIC1901	CMC1_208_1	139.835	139.895	'short'	0.116529	0.00539455	0.166092	0.00477182	-0.0471634	0.00408071	2.66799	0.174879	8.33427	0.120275		-35.5292	-290.275	-35.7865	-286.298		0.276378		714.597	61.829	100.008	-1.32057	0.209045	4.65682		-1.32057	0.336833	0.602873		3.65982	0.0921001	0.164518
ALHIC1901	CMC1_208_5	140.075	140.135	'short'	0.130347	0.00539455	0.173004	0.00477182	-0.0414692	0.00408071	3.66504	0.174879	8.9332	0.120275		-36.3578	-296.476	-36.6079	-292.434		0.205031		628.321	61.829	92.7348	-0.493272	0.209045	5.10074		-0.493272	0.231155	0.550847		3.43443	0.0624851	0.148558
ALHIC1901	CMC1_208_7	140.345	140.435	'short'	0.12055	0.00539455	0.162067	0.00477182	-0.0398713	0.00408071	2.08896	0.174879	9.79263	0.120275		-37.8989	-309.083	-38.1354	-304.907		0.235147		604.11	61.829	90.7673	-1.80088	0.209045	6.19895		-1.80088	0.416445	0.650712		3.79196	0.114626	0.178792
ALHIC1901	CMC1_208_9	140.535	140.565	'short'	0.12328	0.00539455	0.162521	0.00477182	-0.0346784	0.00408071	2.89166	0.174879	9.19033	0.120275		-36.9822	-301.106	-37.2267	-297.015		0.260075		525.43	61.829	84.6366	-1.01219	0.209045	5.58874		-1.01219	0.291001	0.578517		3.57548	0.0792307	0.157179
ALHIC1901	CMC1_209_1	140.585	140.655	'short'	0.103138	0.00539455	0.155535	0.00477182	-0.0446181	0.00408071	NaN	0.174879	NaN	0.120275		-37.9202	-307.841	-38.1565	-303.678		0.266122		676.031	61.829	96.7096	NaN	0.209045	NaN		NaN	NaN	NaN		NaN	NaN	NaN
ALHIC1901	CMC1_209_4	140.825	140.865	'short'	0.101801	0.00539455	0.142448	0.00477182	-0.0401403	0.00408071	1.45899	0.174879	9.24922	0.120275		-38.2522	-311.294	-38.4856	-307.095		0.285209		608.186	61.829	91.0961	-1.95866	0.209045	6.09156		-1.95866	0.44402	0.668695		3.83558	0.122484	0.184148
ALHIC1901	CMC1_209_6	140.955	141.055	'short'	0.10918	0.00539455	0.145884	0.00477182	-0.0359419	0.00408071	1.64221	0.174879	8.86467	0.120275		-38.0906	-309.954	-38.3254	-305.769		0.274451		544.574	61.829	86.0884	-1.85837	0.209045	5.63219		-1.85837	0.426429	0.657146		3.80784	0.117468	0.180708
ALHIC1901	CMC1_210_1	141.365	141.445	'short'	0.125098	0.00539455	0.170071	0.00477182	-0.043723	0.00408071	2.55801	0.174879	8.9338	0.120275		-36.9015	-301.114	-37.1468	-297.022		0.256246		662.47	61.829	95.5673	-1.52545	0.209045	5.16618		-1.52545	0.369837	0.621916		3.71606	0.101411	0.17021
ALHIC1901	CMC1_210_4	141.625	141.725	'short'	0.104674	0.00539455	0.154344	0.00477182	-0.0578116	0.00408071	2.42721	0.174879	8.957	0.120275		-37.3824	-304.267	-37.6234	-300.142		NaN		875.933	61.829	114.484	-1.27887	0.209045	5.53709		-1.27887	0.330334	0.599267		3.64839	0.0902713	0.163436
ALHIC1901	CMC1_210_6	141.865	142.045	'long'	0.0772988	0.00539455	0.151248	0.00477182	-0.0754682	0.00408071	2.41487	0.174879	9.25926	0.120275		-36.9569	-300.313	-37.2016	-296.23		0.140889		1143.46	61.829	140.155	-1.21697	0.209045	5.90684		-1.21697	0.320843	0.594088		3.63144	0.087603	0.161881
ALHIC1901	CMC1_211_1	142.225	142.315	'long'	0.0913382	0.00539455	0.152968	0.00477182	-0.0539604	0.00408071	2.06079	0.174879	9.72674	0.120275		-37.26	-302.964	-37.5021	-298.853		0.162029		817.582	61.829	109.137	-1.61099	0.209045	6.33468		-1.61099	0.384072	0.630485		3.7396	0.105438	0.172766
ALHIC1901	CMC1_211_4	142.475	142.565	'long'	0.0983627	0.00539455	0.150436	0.00477182	-0.0549846	0.00408071	2.21958	0.174879	9.517	0.120275		-37.2726	-302.879	-37.5146	-298.768		0.151333		833.101	61.829	110.548	-1.39211	0.209045	6.18167		-1.39211	0.348165	0.609277		3.67944	0.0952925	0.166435
ALHIC1901	CMC1_212_1	143.025	143.085	'long'	0.0913351	0.00539455	0.138713	0.00477182	-0.0510346	0.00408071	2.37773	0.174879	8.60015	0.120275		-36.8467	-298.13	-37.0925	-294.07		0.141575		773.251	61.829	105.155	-0.953509	0.209045	5.52713		-0.953509	0.282961	0.574515		3.55947	0.0769795	0.155961
ALHIC1901	CMC1_212_5	143.615	143.745	'long'	0.0345739	0.00539455	0.172854	0.00477182	-0.151747	0.00408071	3.36914	0.174879	10.3699	0.120275		-35.5829	-286.032	-35.8397	-282.1		NaN		2299.2	61.829	260.36	-0.784341	0.209045	6.53529		-0.784341	0.261357	0.564188		3.51341	0.0709359	0.152789
ALHIC1901	CMC1_212_6	143.745	143.795	'long'	0.125	0.00539455	0.184231	0.00477182	-0.0621343	0.00408071	3.00133	0.174879	9.38316	0.120275		-37.3867	-304.959	-37.6277	-300.827		0.0975401		941.428	61.829	120.611	-1.42329	0.209045	5.3007		-1.42329	0.353171	0.612152		3.68799	0.0967042	0.167294
ALHIC1901	CMC1_213_5A	144.285	144.415	'long'	0.114418	0.00539455	0.174363	0.00477182	-0.06887	0.00408071	2.87962	0.174879	10.0183	0.120275		-37.2066	-302.007	-37.4491	-297.905		0.103937		1043.49	61.829	130.377	-1.308	0.209045	6.15165		-1.308	0.334865	0.601776		3.65637	0.0915462	0.164189
ALHIC1901	CMC1_213_5B	144.415	144.545	'long'	0.0922876	0.00539455	0.183373	0.00477182	-0.0943464	0.00408071	2.97716	0.174879	9.79241	0.120275		-37.0705	-301.276	-37.3143	-297.182		0.103253		1429.49	61.829	168.963	-1.4268	0.209045	5.72727		-1.4268	0.353737	0.612478		3.68896	0.096864	0.167392
ALHIC1901	CMC1_214_4	144.845	144.905	'long'	0.0603764	0.00539455	0.165396	0.00477182	-0.107165	0.00408071	3.1087	0.174879	9.85698	0.120275		-36.3598	-293.586	-36.6098	-289.574		0.0155886		1623.71	61.829	189.007	-0.864931	0.209045	6.18937		-0.864931	0.271338	0.56888		3.53534	0.073727	0.154237
ALHIC1901	CMC1_214_6	145.125	145.255	'long'	0.0679654	0.00539455	0.174145	0.00477182	-0.108717	0.00408071	2.85638	0.174879	9.86589	0.120275		-36.9173	-298.849	-37.1625	-294.782		0.0356999		1647.22	61.829	191.453	-1.32593	0.209045	6.00464		-1.32593	0.337674	0.603344		3.66129	0.0923368	0.164659
ALHIC1901	CMC1_215_1	145.365	145.465	'long'	0.0926983	0.00539455	0.181483	0.00477182	-0.086431	0.00408071	2.71971	0.174879	9.83724	0.120275		-37.2871	-302.043	-37.529	-297.941		0.0665849		1309.56	61.829	156.76	-1.63784	0.209045	5.81374		-1.63784	0.388588	0.633246		3.74699	0.106718	0.173589
ALHIC1901	CMC1_215_7	146.105	146.225	'long'	0.167413	0.00539455	0.209106	0.00477182	-0.0449089	0.00408071	2.98139	0.174879	9.00068	0.120275		-37.9057	-308.388	-38.1421	-304.219		0.209366		680.437	61.829	97.0828	-2.039	0.209045	4.37008		-2.039	0.458258	0.678233		3.85783	0.126552	0.186989
ALHIC1901	CMC1_217_3	147.205	147.275	'long'	0.174009	0.00539455	0.205377	0.00477182	-0.0364188	0.00408071	3.03909	0.174879	9.33054	0.120275		-38.1583	-310.724	-38.3925	-306.53		0.2506		551.8	61.829	86.6434	-1.89227	0.209045	4.78084		-1.89227	0.432352	0.661005		3.81721	0.119155	0.181857
ALHIC1901	CMC1_217_6	147.505	147.665	'long'	0.179189	0.00539455	0.21402	0.00477182	-0.0382117	0.00408071	3.29414	0.174879	9.61194	0.120275		-38.4497	-313.406	-38.6813	-309.184		0.225026		578.965	61.829	88.7623	-1.8455	0.209045	4.86991		-1.8455	0.424188	0.655694		3.80428	0.11683	0.180276
ALHIC1901	CMC1_221_5	150.945	150.985	'long'	0.132455	0.00539455	0.195076	0.00477182	-0.0764171	0.00408071	3.35229	0.174879	9.35667	0.120275		-37.4672	-304.887	-37.7075	-300.756		0.137483		1157.83	61.829	141.576	-1.33379	0.209045	5.03455		-1.33379	0.33891	0.604036		3.66344	0.0926849	0.164866
ALHIC1901	CMC1_218_2	147.805	147.895	'long'	0.165169	0.00539455	0.203198	0.00477182	-0.0396959	0.00408071	3.53264	0.174879	9.37683	0.120275		-38.0052	-310.214	-38.2407	-306.026		0.251348		601.453	61.829	90.5535	-1.34892	0.209045	4.87508		-1.34892	0.341297	0.605379		3.66759	0.0933573	0.165268
ALHIC1901	CMC1_218_6A	148.435	148.505	'long'	-0.00270925	0.00539455	0.173732	0.00477182	-0.176518	0.00408071	3.88978	0.174879	10.6864	0.120275		-35.0555	-282.462	-35.317	-278.568		-0.102607		2674.51	61.829	300.623	-0.286915	0.209045	6.83115		-0.286915	0.216778	0.54497		3.37864	0.0584289	0.14654
ALHIC1901	CMC1_219_2	148.645	148.735	'long'	0.0449264	0.00539455	0.174807	0.00477182	-0.133029	0.00408071	3.62745	0.174879	10.9723	0.120275		-35.4636	-286.968	-35.7215	-283.026		0.0273181		2015.6	61.829	230.175	-0.573959	0.209045	7.09217		-0.573959	0.238489	0.553965		3.45629	0.0645403	0.149571
ALHIC1901	CMC1_219_4	148.815	148.865	'long'	0.0384401	0.00539455	0.164149	0.00477182	-0.130926	0.00408071	3.57148	0.174879	10.0096	0.120275		-35.7755	-289.327	-36.0306	-285.36		-0.0283191		1983.72	61.829	226.8	-0.374055	0.209045	6.3691		-0.374055	0.222028	0.54708		3.40218	0.0599177	0.14729
ALHIC1901	CMC1_220_2	149.415	149.525	'long'	0.0318201	0.00539455	0.170475	0.00477182	-0.137308	0.00408071	3.3177	0.174879	10.2929	0.120275		-35.5359	-287.224	-35.7932	-283.279		0.013694		2080.42	61.829	237.051	-0.778541	0.209045	6.51123		-0.778541	0.260663	0.563866		3.51184	0.0707417	0.152689
ALHIC1901	CMC1_220_4	149.685	149.835	'long'	0.120852	0.00539455	0.194135	0.00477182	-0.0715378	0.00408071	2.48209	0.174879	9.15074	0.120275		-37.151	-303.433	-37.394	-299.317		0.15899		1083.91	61.829	134.308	-2.17741	0.209045	4.85029		-2.17741	0.483057	0.695229		3.89622	0.133658	0.192054
ALHIC1901	CMC1_221_1	150.195	150.275	'long'	0.117296	0.00539455	0.184874	0.00477182	-0.0632635	0.00408071	2.5997	0.174879	9.02245	0.120275		-37.2426	-303.125	-37.4849	-299.012		0.17688		958.538	61.829	122.23	-1.83854	0.209045	4.92725		-1.83854	0.422977	0.654912		3.80236	0.116485	0.180043
ALHIC1901	CMC1_217_7	147.665	147.765	'long'	0.133988	0.00539455	0.179873	0.00477182	-0.0528179	0.00408071	3.18461	0.174879	8.93113	0.120275		-37.2765	-302.29	-37.5184	-298.185		0.144606		800.271	61.829	107.574	-1.13638	0.209045	4.94682		-1.13638	0.308795	0.587669		3.6094	0.0842197	0.159948
ALHIC1901	CMC1_222_4	151.255	151.385	'long'	0.173072	0.00539455	0.216374	0.00477182	-0.0447702	0.00408071	3.66459	0.174879	10.3699	0.120275		-38.4882	-316.092	-38.7195	-311.842		0.208703		678.337	61.829	96.9048	-1.53334	0.209045	5.57224		-1.53334	0.37114	0.622691		3.71823	0.101779	0.170442
ALHIC1901	CMC1_222_3	151.155	151.255	'long'	0.186895	0.00539455	0.224959	0.00477182	-0.0368423	0.00408071	3.36611	0.174879	9.37892	0.120275		-38.6995	-315.797	-38.9289	-311.549		0.210575		558.216	61.829	87.1392	-2.03588	0.209045	4.3963		-2.03588	0.457704	0.677859		3.85696	0.126394	0.186877
ALHIC1901	CMC1_223_2	151.945	152.075	'long'	0.0180917	0.00539455	0.14206	0.00477182	-0.132586	0.00408071	2.1047	0.174879	9.02494	0.120275		-36.2269	-292.373	-36.4781	-288.374		NaN		2008.88	61.829	229.464	-1.30586	0.209045	5.87656		-1.30586	0.33453	0.60159		3.65578	0.091452	0.164133
ALHIC1901	CMC1_223_4B	152.265	152.415	'long'	0.0214775	0.00539455	0.114849	0.00477182	-0.0994739	0.00408071	2.64432	0.174879	7.96494	0.120275		-36.9375	-299.986	-37.1825	-295.906		NaN		1507.18	61.829	176.944	-0.115369	0.209045	5.4215		-0.115369	0.210315	0.542432		3.33239	0.0565487	0.145499
ALHIC1901	CMC1_224_4	152.665	152.805	'long'	0.0239002	0.00539455	0.145055	0.00477182	-0.121928	0.00408071	2.73554	0.174879	8.60015	0.120275		-36.4082	-295.655	-36.6578	-291.621		NaN		1847.39	61.829	212.411	-0.748983	0.209045	5.38686		-0.748983	0.257175	0.562262		3.5038	0.0697666	0.152191
ALHIC1901	CMC1_225_3	153.035	153.135	'long'	0.00248309	0.00539455	0.175922	0.00477182	-0.172028	0.00408071	2.66246	0.174879	8.95177	0.120275		-36.0967	-291.369	-36.3491	-287.381		NaN		2606.48	61.829	293.304	NaN	0.209045	5.05472		NaN	NaN	NaN		NaN	NaN	NaN
ALHIC1901	CMC1_226_2	153.865	153.975	'long'	0.085394	0.00539455	0.144404	0.00477182	-0.0593064	0.00408071	3.78669	0.174879	8.95177	0.120275		-36.924	-299.183	-37.1691	-295.112		NaN		898.581	61.829	116.589	0.314136	0.209045	5.75175		NaN	NaN	0.545571		NaN	NaN	NaN
ALHIC1901	CMC1_227_6	154.665	154.755	'long'	0.0968686	0.00539455	0.151342	0.00477182	-0.0558537	0.00408071	2.54374	0.174879	8.4595	0.120275		-36.2242	-295.858	-36.4755	-291.821		NaN		846.268	61.829	111.752	-1.09083	0.209045	5.10764		-1.09083	0.302153	0.584206		3.59695	0.0823565	0.158903
ALHIC1901	CMC1_228_1	154.755	154.845	'long'	0.0923943	0.00539455	0.145727	0.00477182	-0.0588092	0.00408071	2.47287	0.174879	8.3028	0.120275		-36.3137	-295.884	-36.5641	-291.848		NaN		891.048	61.829	115.887	-1.02685	0.209045	5.0756		-1.02685	0.293047	0.579548		3.57948	0.0798039	0.157492
ALHIC1901	CMC1_231_1	157.175	157.265	'long'	0.0109466	0.00539455	0.130583	0.00477182	-0.120993	0.00408071	2.26983	0.174879	7.84922	0.120275		-36.4776	-296.228	-36.7266	-292.188		NaN		1833.23	61.829	210.922	-0.866154	0.209045	4.95819		-0.866154	0.271494	0.568954		3.53567	0.0737706	0.15426
ALHIC1901	CMC1_233_1	158.745	158.805	'long'	-0.00556551	0.00539455	0.165978	0.00477182	-0.177171	0.00408071	4.6188	0.174879	12.8657	0.120275		-35.711	-288.744	-35.9668	-284.783		NaN		2684.4	61.829	301.688	0.62521	0.209045	9.17425		0.62521	0.243589	0.556179		3.13402	0.0647898	0.147608
ALHIC1901	CMC1_233_2B	158.895	158.925	'long'	-0.0147663	0.00539455	0.176149	0.00477182	-0.202289	0.00408071	4.46609	0.174879	14.1242	0.120275		-35.443	-286.222	-35.7011	-282.288		NaN		3064.98	61.829	342.77	0.228962	0.209045	10.2021		0.228962	0.214002	0.543872		3.23989	0.0572543	0.145167
ALHIC1901	CMC1_233_5	159.405	159.545	'long'	0.0194961	0.00539455	0.191144	0.00477182	-0.182512	0.00408071	2.84579	0.174879	15.553	0.120275		-35.7863	-289.333	-36.0413	-285.366		NaN		2765.33	61.829	310.407	-1.74375	0.209045	11.2918		NaN	NaN	0.644458		NaN	NaN	NaN
ALHIC1901	CMC1_234_3	159.675	159.755	'long'	0.346411	0.00539455	0.601911	0.00477182	-0.263188	0.00408071	-0.435207	0.174879	117.121	0.120275		-34.0382	-274.487	-34.3086	-270.678		NaN		3987.7	61.829	442.983	-14.7667	0.209045	102.43		NaN	NaN	3.00265		NaN	NaN	NaN
ALHIC1901	CMC1-180-6	121.925	122.025	'short'	0.0895192	0.00518154	0.122125	0.00553876	-0.0300983	0.00391664	1.75846	0.108234	8.96769	0.17941		-37.7738	-308.04	-38.0114	-303.875		NaN		456.035	59.3431	77.7046	-1.17323	0.171427	6.26064		-1.17323	0.290595	0.578313		3.61947	0.0793101	0.157499
ALHIC1901	CMC1_183_1	123.325	123.375	'short'	0.0859099	0.00518154	0.120887	0.00553876	-0.0368585	0.00391664	0.752101	0.108234	8.3667	0.17941		-38.2313	-311.488	-38.4649	-307.286		NaN		558.463	59.3431	85.4128	-2.14699	0.171427	5.68865		-2.14699	0.462354	0.681007		3.88778	0.12789	0.188059
ALHIC1901	CMC1-191-3	128.135	128.195	'short'	0.109897	0.00518154	0.157617	0.00553876	-0.0401009	0.00391664	3.81435	0.108234	9.65847	0.17941		-36.1305	-294.925	-36.3826	-290.899		NaN		607.59	59.3431	89.3784	0.0245903	0.171427	6.16375		0.0245903	0.171498	0.528594		3.29473	0.0460316	0.141517
ALHIC1901	CMC1-194-1	129.805	129.855	'short'	0.0991032	0.00518154	0.141588	0.00553876	-0.0382994	0.00391664	2.14518	0.108234	9.15624	0.17941		-37.8006	-308.573	-38.0379	-304.402		NaN		580.294	59.3431	87.156	-1.25421	0.171427	6.01788		-1.25421	0.303824	0.585072		3.64163	0.0830126	0.159523
ALHIC1901	CMC1_213_1	143.795	143.875	'long'	0.0891921	0.00518154	0.173991	0.00553876	-0.0842866	0.00391664	2.7783	0.108234	9.84327	0.17941		-36.8748	-299.046	-37.1203	-294.977		NaN		1277.07	59.3431	152.498	-1.39998	0.171427	5.98552		-1.39998	0.328307	0.598152		3.6816	0.0898815	0.163428
ALHIC1901	CMC1-218-6B	148.435	148.505	'long'	-0.0274973	0.00518154	0.165701	0.00553876	-0.189266	0.00391664	4.21438	0.108234	12.3693	0.17941		-34.3249	-277.65	-34.5928	-273.806		NaN		2867.67	59.3431	320.978	0.229055	0.171427	8.68579		0.229055	0.177443	0.530553		3.23987	0.0474856	0.141625
ALHIC1901	CMC1_225_3_rep2	153.035	153.135	'long'	-0.0137833	0.00518154	0.132154	0.00553876	-0.143335	0.00391664	2.90411	0.108234	9.13418	0.17941		-35.8973	-289.642	-36.1514	-285.672		NaN		2171.74	59.3431	246.152	-0.271558	0.171427	6.20468		-0.271558	0.179825	0.531354		3.37449	0.0484711	0.142861
ALHIC1901	CMC1_226_2rep2	153.865	153.975	'long'	0.0847811	0.00518154	0.134794	0.00553876	-0.0564132	0.00391664	1.75741	0.108234	8.53265	0.17941		-36.637	-297.315	-36.8846	-293.264		NaN		854.745	59.3431	111.183	-1.47788	0.171427	5.54651		-1.47788	0.341691	0.605601		3.70299	0.0936458	0.165647
ALHIC1901	CMC1_228_2	154.845	154.945	'long'	0.0839768	0.00518154	0.168765	0.00553876	-0.0767723	0.00391664	2.5042	0.108234	9.11939	0.17941		-36.2193	-294.797	-36.4706	-290.773		NaN		1163.22	59.3431	141.045	-1.54773	0.171427	5.37997		-1.54773	0.353845	0.612541		3.72219	0.0970698	0.167712
ALHIC1901	CMC1_228_3	154.945	155.065	'long'	0.043504	0.00518154	0.136672	0.00553876	-0.0907415	0.00391664	2.10015	0.108234	8.26105	0.17941		-36.4446	-295.463	-36.6939	-291.431		NaN		1374.87	59.3431	162.462	-1.18126	0.171427	5.23418		-1.18126	0.291895	0.578967		3.62167	0.0796736	0.157695
ALHIC1901	CMC1_228_5	155.355	155.435	'long'	0.0258053	0.00518154	0.128403	0.00553876	-0.105795	0.00391664	2.65007	0.108234	8.34355	0.17941		-36.4977	-296.23	-36.7466	-292.19		NaN		1602.95	59.3431	186.043	-0.434816	0.171427	5.49932		-0.434816	0.192224	0.535677		3.41861	0.0519317	0.14436
ALHIC1901	CMC1_229_2	155.585	155.665	'long'	-0.0239761	0.00518154	0.104476	0.00553876	-0.123536	0.00391664	2.29044	0.108234	7.71572	0.17941		-37.0924	-301.484	-37.336	-297.388		NaN		1871.76	59.3431	214.275	-0.219439	0.171427	5.4023		-0.219439	0.176956	0.53039		3.36043	0.0476626	0.142495
ALHIC1901	CMC1_229_3A	155.665	155.815	'long'	-0.0215315	0.00518154	0.10552	0.00553876	-0.127159	0.00391664	2.17614	0.108234	7.8917	0.17941		-36.9193	-300.704	-37.1644	-296.616		NaN		1926.66	59.3431	220.084	-0.358514	0.171427	5.55477		-0.358514	0.185819	0.533412		3.39798	0.0501478	0.143592
ALHIC1901	CMC1_229_4	155.815	156.055	'long'	-0.0130439	0.00518154	0.108253	0.00553876	-0.123514	0.00391664	2.0905	0.108234	7.58715	0.17941		-36.8719	-299.32	-37.1175	-295.247		NaN		1871.43	59.3431	214.24	-0.509491	0.171427	5.19049		-0.509491	0.199426	0.538303		3.43882	0.0539334	0.145222
ALHIC1901	CMC1_230_1	156.325	156.445	'long'	0.0405525	0.00518154	0.134247	0.00553876	-0.0937992	0.00391664	1.88802	0.108234	8.27032	0.17941		-36.4301	-296.68	-36.6795	-292.636		NaN		1421.2	59.3431	167.216	-1.33457	0.171427	5.29706		-1.33457	0.317223	0.592141		3.66366	0.0867692	0.161635
ALHIC1901	CMC1_230_2B	156.445	156.655	'long'	0.0270198	0.00518154	0.130991	0.00553876	-0.100406	0.00391664	2.16787	0.108234	7.54426	0.17941		-36.636	-298.815	-36.8836	-294.747		NaN		1521.3	59.3431	177.553	-0.977567	0.171427	4.64509		-0.977567	0.260025	0.563571		3.56603	0.0707767	0.153057
ALHIC1901	CMC1_230_3B	156.825	156.895	'long'	0.0095365	0.00518154	0.124382	0.00553876	-0.110516	0.00391664	2.39709	0.108234	8.03145	0.17941		-36.5596	-298.676	-36.8079	-294.61		NaN		1674.49	59.3431	193.517	-0.590595	0.171427	5.277		-0.590595	0.208181	0.541608		3.4608	0.0563646	0.146283
ALHIC1901	CMC1_230_4B	157.075	157.175	'long'	0.00344173	0.00518154	0.122541	0.00553876	-0.113017	0.00391664	2.96166	0.108234	7.99777	0.17941		-36.4881	-297.63	-36.737	-293.575		NaN		1712.38	59.3431	197.488	0.016482	0.171427	5.28414		0.016482	0.171459	0.528581		3.29691	0.0460265	0.14153
ALHIC1901	CMC1_231_2	157.345	157.425	'long'	0.0481799	0.00518154	0.143324	0.00553876	-0.0913634	0.00391664	2.2244	0.108234	8.49547	0.17941		-36.3015	-295.873	-36.552	-291.837		NaN		1384.29	59.3431	163.427	-1.21686	0.171427	5.32079		-1.21686	0.297686	0.581908		3.63141	0.081294	0.158576
ALHIC1901	CMC1_231_4	157.595	157.665	'long'	-0.0317745	0.00518154	0.109357	0.00553876	-0.145646	0.00391664	2.57523	0.108234	7.83854	0.17941		-36.4919	-296.272	-36.7408	-292.231		NaN		2206.76	59.3431	249.892	-0.0524966	0.171427	5.41688		-0.0524966	0.171749	0.528675		3.31546	0.0461501	0.141695
ALHIC1901	CMC1_233_3	158.925	159.115	'long'	-0.0271707	0.00518154	0.168092	0.00553876	-0.190806	0.00391664	5.08066	0.108234	15.3615	0.17941		-35.6034	-288.308	-35.8601	-284.352		NaN		2891	59.3431	323.499	1.03446	0.171427	11.6139		1.03446	0.268684	0.567619		3.02529	0.0710421	0.149771
ALHIC1901	CMC1_233_4	159.115	159.295	'long'	-0.0249116	0.00518154	0.165304	0.00553876	-0.1911	0.00391664	5.35628	0.108234	15.0742	0.17941		-35.6682	-288.932	-35.9243	-284.969		NaN		2895.46	59.3431	323.982	1.37596	0.171427	11.3897		1.37596	0.324219	0.595918		2.93504	0.0852866	0.156465
ALHIC1901	CMC1_234_1	159.405	159.545	'long'	0.0359692	0.00518154	0.220389	0.00553876	-0.185524	0.00391664	3.54403	0.108234	17.9341	0.17941		-35.6488	-288.422	-35.9051	-284.465		NaN		2810.98	59.3431	314.851	-1.74946	0.171427	13.0111		NaN	NaN	0.633886		NaN	NaN	NaN
ALHIC1901	CMC1_234_2	159.5	159.675	'long'	0.108515	0.00518154	0.302146	0.00553876	-0.198252	0.00391664	4.07627	0.108234	31.9152	0.17941		-35.3781	-286.206	-35.6368	-282.272		NaN		3003.82	59.3431	335.707	-3.17736	0.171427	25.0797		NaN	NaN	0.826566		NaN	NaN	NaN
ALHIC1901	CMC1-177-6	119.695	119.895	'short'	0.245859	0.00436389	0.273672	0.00636666	-0.0287184	0.00351346	6.28089	0.0959638	11.7958	0.155314		-35.6891	-293.219	-35.9451	-289.211		NaN		435.127	53.2343	71.588	-0.305932	0.180445	5.72317		-0.305932	0.190536	0.535074		3.38377	0.0513799	0.143928
ALHIC1901	CMC1-195-1	130.655	130.755	'short'	0.129116	0.00630083	0.173937	0.00636666	-0.0447242	0.00351346	2.72605	0.0959638	10.3218	0.155314		-36.8652	-301.069	-37.1108	-296.978		NaN		677.639	53.2343	91.5978	-1.45073	0.180445	6.46343		-1.45073	0.34168	0.605595		3.69553	0.0936044	0.165578
ALHIC1901	CMC1-193-1	128.915	129.075	'short'	0.0784213	0.00493554	0.125276	0.00636666	-0.038988	0.00351346	1.40319	0.0959638	9.06691	0.155314		-37.769	-306.592	-38.0067	-302.442		NaN		590.727	53.2343	84.0017	-1.60294	0.180445	6.28986		-1.60294	0.367881	0.620755		3.73738	0.100993	0.170092
ALHIC1901	CMC1-199-1	133.635	133.685	'short'	0.0891633	0.00816268	0.133019	0.00636666	-0.0528181	0.00351346	2.02375	0.0959638	9.43981	0.155314		-37.2808	-302.264	-37.5228	-298.16		NaN		800.274	53.2343	102.875	-1.16986	0.180445	6.49027		-1.16986	0.295471	0.580778		3.61855	0.080634	0.158159
ALHIC1901	CMC1-197-1	132.335	132.425	'short'	0.0724185	0.0055274	0.131145	0.00636666	-0.0575887	0.00351346	2.03483	0.0959638	9.50128	0.155314		-37.1127	-301.36	-37.3561	-297.266		NaN		872.556	53.2343	109.755	-1.1139	0.180445	6.59306		-1.1139	0.28669	0.57636		3.60325	0.0781774	0.156831
ALHIC1901	CMC1-187-2	124.905	124.955	'short'	0.0687757	0.00543585	0.126259	0.00636666	-0.0545514	0.00351346	1.5719	0.0959638	8.78463	0.155314		-36.656	-295.97	-36.9034	-291.933		NaN		826.536	53.2343	105.357	-1.45829	0.180445	5.9866		-1.45829	0.342964	0.60632		3.69761	0.093966	0.165795
ALHIC1901	CMC1-196-2	131.565	131.605	'short'	0.0935393	0.00722823	0.139653	0.00636666	-0.0520094	0.00351346	2.39389	0.0959638	9.42702	0.155314		-36.7334	-298.299	-36.9801	-294.237		NaN		788.021	53.2343	101.724	-0.959952	0.180445	6.33065		-0.959952	0.263478	0.565173		3.56123	0.0716961	0.15345
ALHIC1901	CMC1-233-2A	158.805	158.895	'long'	0.000281893	0.00600061	0.187532	0.00636666	-0.188	0.00351346	5.00747	0.0959638	14.1306	0.155314		-35.5917	-287.469	-35.8485	-283.522		NaN		2848.48	53.2343	317.823	0.49475	0.180445	9.95557		0.49475	0.205794	0.540695		3.16881	0.0548533	0.143778
ALHIC1902	CMC2_150_2	134.71	134.83	'long'	0.109038	0.00723692	0.150963	0.00829762	-0.032966	0.00686517	2.53344	0.16205	9.93693	0.246293		NaN	NaN	NaN	NaN		NaN		499.485	104.018	117.637	-0.87018	0.25676	7.21244		-0.87018	0.310184	0.5884		3.53677	0.0842647	0.159519
ALHIC1902	CMC2-279-2	192.08	192.22	'long'	-0.033561	0.00518154	0.136064	0.00553876	-0.169995	0.00391664	3.55862	0.108234	10.1579	0.17941		-35.5077	-286.249	-35.7652	-282.314		NaN		2575.68	59.3431	289.473	0.287025	0.171427	7.13884		0.287025	0.180783	0.531679		3.22434	0.0483383	0.141807
ALHIC1902	CMC2-310-1	202.4	202.59	'long'	0.132271	0.00518154	0.430648	0.00553876	-0.300157	0.00391664	-26.6478	0.108234	76.2688	0.17941		-33.4067	-268.992	-33.6827	-265.24		NaN		4547.83	59.3431	503.769	-36.654	0.171427	66.1222		NaN	NaN	7.34983		NaN	NaN	NaN
ALHIC1902	CMC2-313_4_5	203.27	203.44	'long'	0.0938532	0.00518154	0.3756	0.00553876	-0.285087	0.00391664	-19.4984	0.108234	57.3891	0.17941		-33.484	-269.77	-33.7594	-266.011		NaN		4319.5	59.3431	478.836	-28.2957	0.171427	48.6893		NaN	NaN	5.68377		NaN	NaN	NaN
ALHIC1902	CMC2-313-6	203.44	203.56	'long'	0.0906907	0.00518154	0.38194	0.00553876	-0.288611	0.00391664	-17.6336	0.108234	54.9707	0.17941		-33.4985	-269.932	-33.7737	-266.171		NaN		4372.89	59.3431	484.664	-26.5957	0.171427	46.1449		NaN	NaN	5.34533		NaN	NaN	NaN
ALHIC1902	CMC2-315-1	204.03	204.11	'long'	0.196039	0.00518154	0.503403	0.00553876	-0.305326	0.00391664	-27.0647	0.108234	69.8832	0.17941		-33.2288	-267.389	-33.5064	-263.655		NaN		4626.16	59.3431	512.326	-38.7458	0.171427	58.1027		NaN	NaN	7.76716		NaN	NaN	NaN
ALHIC1902	CMC2-324_1 23-40cm	206.36	206.53	'long'	NaN	NaN	NaN	NaN	NaN	NaN	NaN	NaN	NaN	NaN		-25.1091	-196.252	-25.4581	-193.272		NaN		NaN	NaN	NaN	NaN	NaN	NaN		NaN	NaN	NaN		NaN	NaN	NaN
ALHIC1902	CMC2-167-2	147.87	148.07	'long'	0.101408	0.00428424	0.151014	0.00636666	-0.056341	0.00351346	2.52761	0.0959638	8.43123	0.155314		-36.4	-296	-36.6497	-291.962		NaN		853.652	53.2343	107.942	-1.09903	0.180445	5.08672		-1.09903	0.284386	0.575217		3.59919	0.0775333	0.156487
ALHIC1902	CMC2-189-2	157.08	157.31	'long'	0.0950988	0.00166638	0.146013	0.00636666	-0.0529679	0.00351346	2.31627	0.0959638	8.24754	0.155314		-36.7	-298.8	-36.947	-294.733		NaN		802.544	53.2343	103.088	-1.18975	0.180445	5.01419		-1.18975	0.298632	0.582392		3.62399	0.0815187	0.158644
ALHIC1902	CMC2-200-2	160.29	160.59	'long'	0.0837514	0.0101539	0.149433	0.00636666	-0.0680805	0.00351346	2.19787	0.0959638	8.65378	0.155314		-36.5117	-296.652	-36.7604	-292.608		NaN		1031.52	53.2343	125.335	-1.3897	0.180445	5.3435		-1.3897	0.331376	0.599842		3.67877	0.0907057	0.163863
ALHIC1902	CMC2-160-2	142.11	142.32	'long'	0.0947418	0.00353528	0.157049	0.00636666	-0.0662344	0.00351346	2.46406	0.0959638	9.49258	0.155314		-36.7	-298.8	-36.947	-294.733		NaN		1003.55	53.2343	122.556	-1.307	0.180445	6.01099		-1.307	0.317633	0.59236		3.6561	0.086845	0.161629
ALHIC1902	CMC2-164-1	145.06	145.21	'long'	0.102093	0.00670365	0.145827	0.00636666	-0.0437732	0.00351346	2.33301	0.0959638	8.52881	0.155314		-37	-301.3	-37.2444	-297.206		NaN		663.231	53.2343	90.3127	-1.16861	0.180445	5.29867		-1.16861	0.295273	0.580678		3.61821	0.0805786	0.158129
ALHIC1902	CMC2-214-3	166.58	166.75	'long'	0.0837667	0.0050544	0.163114	0.00636666	-0.0793156	0.00351346	3.49016	0.0959638	9.97732	0.155314		-36.9503	-298.243	-37.1951	-294.182		NaN		1201.75	53.2343	142.509	-0.430248	0.180445	6.35979		-0.430248	0.199912	0.538484		3.41737	0.0540022	0.145103
ALHIC1902	CMC2-257-1	184.2	184.45	'long'	-0.0041172	0.00337633	0.153811	0.00636666	-0.169064	0.00351346	3.56677	0.0959638	11.0103	0.155314		-35.6013	-287.328	-35.858	-283.382		NaN		2561.57	53.2343	286.758	-0.130744	0.180445	7.59524		-0.130744	0.182329	0.532207		3.33653	0.0490449	0.142799
ALHIC1902	CMC2-234-1	177.31	177.5	'long'	0.0943722	0.00386392	0.151298	0.00636666	-0.062316	0.00351346	2.57577	0.0959638	9.02498	0.155314		-36.549	-296.259	-36.7974	-292.219		NaN		944.182	53.2343	116.708	-1.05787	0.180445	5.67221		-1.05787	0.278072	0.572122		3.58795	0.0757691	0.155554
ALHIC1902	CMC2-321-2	205.45	205.85	'long'	1.22057	0.0125624	1.63313	0.0246315	-0.395471	0.024244	NaN	NaN	NaN	NaN		-29.1877	-234.499	-29.5009	-231.114		NaN		5991.99	367.333	754.567	NaN	NaN	NaN		NaN	NaN	NaN		NaN	NaN	NaN
ALHIC1902	CMC2-319-1	204.98	205.05	'long'	0.621019	0.0307149	0.946296	0.0222724	-0.375452	0.0311787	-103.924	1.16235	140.737	0.211756		-32.1943	-259.577	-32.481	-255.926		NaN		5688.67	472.404	784.049	NaN	NaN	117.245		NaN	NaN	NaN		NaN	NaN	NaN
ALHIC1902	CMC2-317-1	204.67	204.76	'long'	0.377309	0.0139409	0.768238	0.0268442	-0.351592	0.0401252	-95.6205	1.89392	98.5703	0.0567146		-32.5268	-261.885	-32.8106	-258.209		NaN		5327.16	607.957	844.389	NaN	NaN	80.1661		NaN	NaN	NaN		NaN	NaN	NaN
ALHIC1902	CMC2-305-1	200.92	201.03	'long'	0.0924217	0.0249561	0.327628	0.0195504	-0.244379	0.0227832	-75.9353	0.128462	21.3323	0.125485		-33.9427	-274.25	-34.214	-270.443		NaN		3702.72	345.2	533.906	NaN	NaN	13.9984		NaN	NaN	NaN		NaN	NaN	NaN
ALHIC1903	CMC3_087_1	77.47	77.57	'short'	0.294851	0.00349463	0.294187	0.00478325	-0.0070647	0.00411758	7.31905	0.305932	9.10013	0.161019		-36.8241	-297.576	-37.07	-293.522		NaN		107.041	62.3875	63.4889	0.232968	0.326763	2.59116		0.232968	0.330068	0.59912		3.23882	0.0882286	0.159841
ALHIC1903	CMC3_127_3	112.81	113.05	'short'	0.307717	0.00349463	0.312963	0.00478325	-0.00883593	0.00411758	7.11203	0.305932	11.2897	0.161019		-38.8279	-316.841	-39.0562	-312.582		NaN		133.878	62.3875	64.1021	-0.438124	0.326763	4.42156		-0.438124	0.338308	0.603699		3.4195	0.0913055	0.162619
ALHIC1903	CMC3_127_3	112.81	113.05	'short'	0.308133	0.00349463	0.311332	0.00478325	-0.00552747	0.00411758	7.15576	0.305932	11.7751	0.161019		-38.9075	-318.72	-39.1351	-314.441		NaN		83.7496	62.3875	63.064	-0.340479	0.326763	4.86989		-0.340479	0.333783	0.601175		3.3931	0.0899594	0.161713
ALHIC1903	CMC3_140	121.27	121.37	'short'	0.312262	0.00349463	0.292821	0.00478325	0.00572513	0.00411758	6.26563	0.305932	12.8548	0.161019		-38.8638	-319.705	-39.0918	-315.416		NaN		-86.7444	62.3875	63.113	-0.780289	0.326763	6.35188		-0.780289	0.362116	0.617356		3.51231	0.0982048	0.167113
ALHIC1903	CMC3_140	121.27	121.37	'short'	0.302729	0.00349463	0.302421	0.00478325	-0.00954902	0.00411758	6.34212	0.305932	13.1835	0.161019		-39.1326	-321.521	-39.3583	-317.212		NaN		144.682	62.3875	64.3855	-0.934487	0.326763	6.46587		-0.934487	0.376437	0.625863		3.55429	0.10231	0.169789
ALHIC1903	CMC3_153	130.89	131.17	'short'	0.200575	0.00349463	0.211018	0.00478325	-0.0107787	0.00411758	2.97028	0.305932	9.56624	0.161019		-40.9754	-340.771	-41.1848	-336.259		NaN		163.314	62.3875	64.9225	-2.09582	0.326763	4.89079		-2.09582	0.531481	0.729707		3.87358	0.146819	0.201276
ALHIC1903	CMC3_158_3	134.99	135.14	'short'	0.162489	0.00349463	0.177849	0.00478325	-0.0143074	0.00411758	2.12383	0.305932	9.49538	0.161019		-42.2544	-349.664	-42.4525	-345.058		NaN		216.779	62.3875	66.7894	-2.14412	0.326763	5.55361		-2.14412	0.539134	0.735299		3.88698	0.149035	0.202959
ALHIC1903	CMC3_159_3	136.72	136.87	'short'	0.175095	0.00349463	0.180003	0.00478325	-0.00418103	0.00411758	1.91163	0.305932	8.8754	0.161019		-41.3558	-342.217	-41.5618	-337.689		NaN		63.349	62.3875	62.7755	-2.40699	0.326763	4.88844		-2.40699	0.581823	0.767149		3.9601	0.161433	0.212552
ALHIC1903	CMC3_161_2	138.43	138.5	'short'	0.197781	0.00349463	0.202474	0.00478325	-0.00357352	0.00411758	2.18099	0.305932	9.79999	0.161019		-41.808	-344.802	-42.0101	-340.247		NaN		54.1442	62.3875	62.6712	-2.67669	0.326763	5.31236		-2.67669	0.627185	0.802098		4.03542	0.174685	0.223101
ALHIC1903	CMC3_167_1	143.5	143.76	'short'	0.213199	0.00349463	0.216413	0.00478325	-0.00550462	0.00411758	2.741	0.305932	9.31978	0.161019		-41.7226	-345.257	-41.9254	-340.697		NaN		83.4033	62.3875	63.0585	-2.45308	0.326763	4.52627		-2.45308	0.589473	0.772967		3.97295	0.163662	0.214306
ALHIC1903	CMC3_159_3	136.72	136.82	'short'	0.174717	0.00539455	0.177348	0.00477182	-0.00565649	0.00408071	2.11338	0.174879	8.32424	0.120275		NaN	NaN	NaN	NaN		NaN		85.7043	61.829	62.5436	-2.14252	0.209045	4.39812		-2.14252	0.476777	0.690881		3.88654	0.131856	0.190758
ALHIC1903	CMC3_158_3	134.99	135.14	'short'	0.169648	0.00539455	0.177756	0.00477182	-0.00822729	0.00408071	1.64867	0.174879	9.79056	0.120275		NaN	NaN	NaN	NaN		NaN		124.656	61.829	63.3312	-2.61502	0.209045	5.8497		-2.61502	0.563235	0.753149		4.01817	0.156801	0.209365
ALHIC1903	CMC3_087_1	77.47	77.57	'short'	0.295994	0.00539455	0.307032	0.00477182	-0.0106484	0.00408071	7.20521	0.174879	8.05358	0.120275		NaN	NaN	NaN	NaN		NaN		161.34	61.829	64.3257	-0.18825	0.209045	1.26845		-0.18825	0.212409	0.543247		3.35202	0.0571711	0.14587
ALHIC1502		35.27	NaN	'short'	NaN	NaN	NaN	NaN	-0.023	0.006	NaN	NaN	NaN	NaN		-35.3	-287	-35.5594	-283.058		NaN		350	90.9091	98.7254	-0.26	0.254635	NaN		-0.26	0.25989	0.563509		3.37137	0.0699998	0.151446
ALHIC1502		79.02	NaN	'short'	NaN	NaN	NaN	NaN	-0.038	0.006	NaN	NaN	NaN	NaN		-37.4	-305	-37.6409	-300.867		NaN		570	90.9091	110.434	-2.76	0.254635	NaN		-2.76	0.6079	0.78711		4.05876	0.169558	0.21924
ALHIC1502		115.45	NaN	'short'	NaN	NaN	NaN	NaN	-0.035	0.006	NaN	NaN	NaN	NaN		NaN	-330	NaN	-325.602		NaN		530	90.9091	107.997	-0.32	0.254635	NaN		-0.32	0.262554	0.564743		3.38757	0.0707777	0.151908
ALHIC1502		142.91	NaN	'short'	NaN	NaN	NaN	NaN	-0.035	0.006	NaN	NaN	NaN	NaN		-35.7	-293	-35.9558	-288.994		NaN		530	90.9091	107.997	-0.19	0.254635	NaN		-0.19	0.257455	0.56239		3.35249	0.0692747	0.150993
ALHIC1502		171.73	NaN	'short'	NaN	NaN	NaN	NaN	-0.05	0.006	NaN	NaN	NaN	NaN		-38.1	-310	-38.3347	-305.814		NaN		750	90.9091	122.763	-1.19	0.254635	NaN		-1.19	0.348544	0.609494		3.62406	0.0951085	0.165994
ALHIC1502		174.2	NaN	'short'	NaN	NaN	NaN	NaN	-0.042	0.006	NaN	NaN	NaN	NaN		-37.5	-305	-37.74	-300.867		NaN		640	90.9091	114.981	-2.12	0.254635	NaN		-2.12	0.494586	0.703289		3.88029	0.136716	0.194099
ALHIC1502		177.23	NaN	'long'	NaN	NaN	NaN	NaN	-0.091	0.006	NaN	NaN	NaN	NaN		-36.9	-300	-37.1453	-295.92		NaN		1380	90.9091	176.94	-1.05	0.254635	NaN		-1.05	0.330059	0.599115		3.5858	0.0898895	0.162842
ALHIC1502		180.77	NaN	'long'	NaN	NaN	NaN	NaN	-0.028	0.006	NaN	NaN	NaN	NaN		-38.3	-314	-38.533	-309.772		NaN		430	90.9091	102.478	-1.99	0.254635	NaN		-1.99	0.472486	0.687926		3.84425	0.13037	0.189506
ALHIC1502		182.2	NaN	'long'	NaN	NaN	NaN	NaN	-0.033	0.006	NaN	NaN	NaN	NaN		-38.6	-316	-38.8303	-311.75		NaN		500	90.9091	106.252	-2.09	0.254635	NaN		-2.09	0.489452	0.699688		3.87197	0.13524	0.193022
ALHIC1502		184.49	NaN	'long'	NaN	NaN	NaN	NaN	-0.125	0.006	NaN	NaN	NaN	NaN		-36.9	-301	-37.1453	-296.909		NaN		1900	90.9091	227.915	-0.97	0.254635	NaN		-0.97	0.320117	0.593696		3.56397	0.087085	0.161185
ALHIC1502		186.67	NaN	'long'	NaN	NaN	NaN	NaN	-0.149	0.006	NaN	NaN	NaN	NaN		-35.5	-288	-35.7576	-284.047		NaN		2260	90.9091	264.701	-0.53	0.254635	NaN		-0.53	0.275817	0.57103		3.44438	0.0745736	0.15406
ALHIC1502		190	NaN	'long'	NaN	NaN	NaN	NaN	-0.058	0.006	NaN	NaN	NaN	NaN		-36.6	-297	-36.8479	-292.952		NaN		880	90.9091	132.796	-0.92	0.254635	NaN		-0.92	0.314157	0.590504		3.55034	0.0854043	0.160204
ALHIC1503		126.98	NaN	'short'	NaN	NaN	NaN	NaN	-0.049	0.006	NaN	NaN	NaN	NaN		-37.8	-308	-38.0374	-303.835		NaN		740	90.9091	122.026	-1.1	0.254635	NaN		-1.1	0.33651	0.602693		3.59945	0.09171	0.163931
ALHIC1503		132.07	NaN	'long'	NaN	NaN	NaN	NaN	-0.102	0.006	NaN	NaN	NaN	NaN		-36.5	-297	-36.7488	-292.952		NaN		1550	90.9091	193.222	-0.98	0.254635	NaN		-0.98	0.321333	0.594352		3.5667	0.0874279	0.161386
ALHIC1503		137.05	NaN	'long'	NaN	NaN	NaN	NaN	-0.093	0.006	NaN	NaN	NaN	NaN		-35.3	-284	-35.5594	-280.09		NaN		1410	90.9091	179.779	-0.73	0.254635	NaN		-0.73	0.293521	0.579789		3.49864	0.0795833	0.156871
ALHIC1503		139.11	NaN	'long'	NaN	NaN	NaN	NaN	-0.045	0.006	NaN	NaN	NaN	NaN		-38.2	-312	-38.4338	-307.793		NaN		680	90.9091	117.726	-2.37	0.254635	NaN		-2.37	0.538066	0.734517		3.94979	0.149257	0.203445
ALHIC1503		141.32	NaN	'long'	NaN	NaN	NaN	NaN	-0.13	0.006	NaN	NaN	NaN	NaN		-36.7	-298	-36.947	-293.941		NaN		1970	90.9091	234.996	-1.12	0.254635	NaN		-1.12	0.339138	0.604165		3.60492	0.0924521	0.164378
ALHIC1503		143.75	NaN	'long'	NaN	NaN	NaN	NaN	-0.106	0.006	NaN	NaN	NaN	NaN		-37.2	-301	-37.4426	-296.909		NaN		1610	90.9091	199.07	-0.43	0.254635	NaN		-0.43	0.268765	0.567657		3.41731	0.0725649	0.152932
ALHIC1503		145.4	NaN	'long'	NaN	NaN	NaN	NaN	-0.133	0.006	NaN	NaN	NaN	NaN		-36.3	-295	-36.5506	-290.973		NaN		2010	90.9091	239.06	-0.63	0.254635	NaN		-0.63	0.284104	0.575078		3.47149	0.0769221	0.155374
ALHIC1503		146.48	NaN	'long'	NaN	NaN	NaN	NaN	-0.178	0.006	NaN	NaN	NaN	NaN		-35.7	-289	-35.9558	-285.037		NaN		2690	90.9091	309.55	-0.31	0.254635	NaN		-0.31	0.262074	0.56452		3.38487	0.0706382	0.151826
