# Supplementary material for: Global ocean heat content over the past 3 million years
Source: Research Square preprint supplement (doi:10.21203/rs.3.rs-5610580/v1), 2025-01-06
Supplement: Supplementary file 2 [file d78f91d4821e48058c62dc4a.docx]

**Methods**

**Sample location and ice core drilling and analysis**

Ice cores analyzed in this study were collected in main ice field of the Allan Hills Blue Ice Area. The main samples analyzed in this study (ALHIC1901, ALHIC1902, Figure S1) were collected during the 2019/20 and 2022/23 Antarctic field seasons. ALHIC1901 was collected with the 24 cm diameter blue ice drill 31 to a bedrock depth of 160 meters and completed within the 2019/20 field season. ALHIC1902 was drilled with the 10cm diameter FORO400 drill to 140 meters in the 2019/20. The borehole was re-accessed in 2022/23. During this second season, the core was drilled to bedrock, which was reached at 206 meters. A total of 106 samples were analyzed for noble gases between the ALHIC1901 (n=88) and ALHIC1902 cores (n=18). Of these samples, 90 were evaluated for mean ocean temperature (MOT) reconstruction. In addition, we include 20 published argon isotope and Xe/Kr measurements from ALHIC1502 (n=12) and ALHIC1503 (n=8)6 in our MOT analysis. Finally, we analyzed 13 samples from the ALHIC1903 ice core, which was collected along the main flow line of the Allan Hills blue ice field with the 9.5” diameter blue ice drill in 2019/20 and reached a depth of 150 meters. Samples from this core were selected in order to compare results of the climate ‘snapshots’ from ALHIC1901 and ALHIC1902 to samples where age and MOT are known, and to validate the Xe/Kr ratios in these blue ice cores against records obtained from traditional deep ice cores.

**Ice Sample Analysis**

Noble gas measurements were made at Princeton University on a MAT 253plus mass spectrometer and measurements are made relative to a modern atmosphere standard and reported in delta notation:

𝛿 = (Rsample/Rstandard – 1) x 1000 (‰)

Where R is the isotopic or elemental ratio of interest and here, we use per mil notation. Samples were processed and analyzed using methods similar to previous studies6,32.

Samples were first analyzed for argon isotopes. The 132Xe/84Kr ratio was then measured via peak jumping methodology. Prior to peak jumping, samples were pressure balanced on 40Ar, as results are more robust when sample and standard are pressure adjusted on the major gas species33. 84Kr/40Ar was also measured for on these samples in order to assess the magnitude of gas loss from the samples.

**Ice sample dating**

Allan Hills ice core samples are dated using precise measurements of argon isotope ratios (𝛿40/38Ar and 𝛿38/36Ar) in air bubbles trapped in the ice. This method utilizes the constant accumulation of 40Ar in the well mixed atmosphere from the radioactive decay of 40K in the crust and mantle and subsequent degassing. This degassing rate was determined by reconstruction of atmospheric 40Ar (𝛿40Aratm) in well dated deep ice core samples12:

𝛿40Aratm = 𝛿40/38Ar – 1.002 𝛿38/36Ar

Measurement of 𝛿38/36Ar (in addition to 𝛿40/38Ar) is required because 40Ar becomes enriched in polar ice samples due to the gravitational separation of gases within the firn34–36. Because 38Ar and 36Ar are primordial, their atmospheric ratio has not changed over time, and therefore may be used to quantify and remove the effect of gravitational settling on 40Ar in measured ice samples. Because ice samples are measured against a modern atmosphere sample, the reconstructed 𝛿40Aratm can then be used to date the ice using the contemporary 40Ar degassing rate of 0.066 ± 0.007‰ Ma-1.

**Mean ocean temperature from Xe/Kr**

**Fractionation corrections**

Changes in atmospheric Xe/Kr are primarily driven by changes in ocean temperature via the differing temperature-dependent solubilities of xenon and krypton in seawater. In brief, due to the stronger temperature dependence of xenon (relative to krypton), there is a larger change in atmospheric xenon concentrations as the ocean warms (leading to xenon ocean outgassing and increase in atmospheric Xe) or cools (leading to xenon ocean uptake and decrease in atmospheric Xe) relative to such changes in atmospheric krypton. This means that atmospheric Xe/Kr increases with ocean warming and decreases with ocean cooling.

Xe/Kr measured in ice cores reflects the past atmospheric Xe/Kr, plus fractionating processes that occur within the ice/firn. As in the case of the argon isotope measurements, we expect that the largest source of fractionation is gravitational settling. We therefore correct the measured Xe/Kr with measured 𝛿38/36Ar:

𝛿Xe/Kratm = ((𝛿Xe/Krmeas/1000+1)/(𝛿38/36Ar/1000+1)24)-1)*1000

We note that this is a relatively simple method of firn fractionation correction, and implicitly assumes no major contribution of thermal or kinetic fractionation to the 𝛿38/36Ar or 𝛿Xe/Kr signals. Previous work has suggested that glacial/interglacial changes in these sources of fractionation may be substantial, and correctly accounting for these changes may be important in calculating glacial/interglacial changes in MOT10,11. Not all ice core sites show this strong control on relative MOT changes9. However, it has been demonstrated that relative MOT change is more robust than absolute MOT, due to the potential of systematic offsets in firn corrections imparting a systematic error in absolute MOT9.

To evaluate the possibility of 1) an absolute offset in our fractionation corrected Xe/Kr and 2) an error in calculated glacial/interglacial MOT change with this correction, we measure noble gas ratios in an Allan Hills ice core (ALHIC1903) covering Termination II and the Last Interglacial and compare computed MOT (see below) to previously published results9 (Figure S2). Comparisons show overall agreement with the range of MOT across the termination, but that absolute MOT in our reconstructions may have a negative bias as large as 0.5°C. We therefore note – as in previous work - that the reconstructed relative MOT change is more robust than the absolute MOT values. To account for this uncertainty, we report both relative and absolute error in our MOT evaluation and include a 0.5°C uncertainty in our absolute error calculation, but do not make an adjustment to absolute MOT. Additional sources of uncertainty that we incorporate into our total error estimate include the analytical uncertainty in the 𝛿Xe/Kr and 𝛿38/36Ar measurements, and the uncertainties associated with the calculation of MOT atmospheric Xe/Kr (detailed below).

**Calculations of MOT from fractionation corrected Xe/Kr**

Atmospherically Xe/Kr is also sensitive to changes in ocean/ice volume changes, due to the change in the total oceanic reservoirs of xenon and krypton driven by changes in 1) atmospheric pressure at sea level (via Henry’s Law), 2) total ocean volume, and 3) salinity (which influences noble gas solubility in seawater). The first of the above processes drives atmospheric Xe/Kr in the opposite direction of the second and third process. The net influence is that when sea level lowers, atmospheric Xe/Kr increases in the absence of ocean temperature change.

Mean ocean temperature studies of the last 800,000 years (e.g. refs 11,37) apply a sea level curve in their box models to compute the effect on calculated mean ocean temperature. However, due to the large (>60,000 year) age uncertainties of our record, this is not possible. Moreover, sea leel changes over the last 3 Ma are poorly constrained. We therefore, as in previous work 6, evaluate a plausible range of sensitivities of atmospheric Xe/Kr to ocean warming/cooling (ΔXe/Kr/ΔMOT) in order to compute MOT changes from reconstructed Xe/Kr.

Without this influence, applying the most up to date noble gas solubilities38, the sensitivity of atmospheric Xe/Kr to ocean warming/cooling is 1.1‰/°C. However, if we assume a constant scaling of ice volume to ocean temperature change of 50 meters per 1°C - based on the LGM ocean temperature and ice volume anomalies37,39, this Xe/Kr sensitivity is 0.8‰/°C. If we include all other effects described in37, including changes in the volume of Antarctic bottom water, floating ice, and new constraints on LGM ocean saturation state40, we find a Xe/Kr sensitivity of 1.0±0.2‰/°C. We therefore adopt a sensitivity of 1.0±0.2‰/°C, which is similar to the sensitivity applied in previous work (0.9±0.2‰/°C6) and covers a broad range of ocean temperature/ice volume/saturation state scenarios. While we have attempted to incorporate systematic uncertainties into our estimate, we acknowledge that – as is the risk with all proxies – we may be neglecting or underestimating potential contributions in our reported total uncertainty.

**Assessment of noble gas ratios in the deepest ice samples and basis for rejection of Xe/Kr data for MOT calculation**

In both the ALHIC1901 and ALHIC1902 samples, there is evidence of gas alteration in the ice samples nearest to the bed. In the case of the deepest ALHIC1902 sample, the sample contained ~one-thousandth the amount of gas of a typical glacial ice sample, and we were therefore unable to analyze the noble gas composition of this ice. Such low air content is consistent with refrozen meltwater, rather than a glacial ice signature. Above this sample, where sample sizes were large enough for analysis of 𝛿38/36Ar, Xe/Kr, and Kr/Ar, we see anomalous values in all three sets of measurements, which showed anomalously positive 𝛿38/36Ar, negative Xe/Kr, and positive Kr/Ar in samples in the bottom five meters of the core. If we were to take these Xe/Kr values as reflecting the true atmospheric composition, we find entirely unphysical results in MOT, with absolute MOT values below -23°C, and well below the freezing point of seawater (-2°C). We therefore conclude that these samples have been altered by other sources of fractionation and reject them from our MOT reconstruction. Unfortunately, there is a large (~10 meter) gap in the ALHIC1902 data, as issues with core quality precluded samples large enough for noble gas analysis. We therefore cannot evaluate the depth interval over which noble gas data appears altered for this core.

In ALHIC1901, we observe the same pattern of gas alteration in the deepest ice. However, the alteration of Xe/Kr is much less severe, and only the deepest sample contains such a negative corrected Xe/Kr value (-15‰) that it may be a priori dismissed as unphysical in terms of reflecting a real ocean-temperature driven change in atmospheric Xe/Kr. The samples just above this deepest sample indicate anomalously negative Xe/Kr values compared samples of comparable age located further away from the bed. They also show a monotonic decrease in corrected Xe/Kr with depth. We therefore reject all Xe/Kr data in the bottom 0.5 meters of this core (159.5-160 meters) for MOT reconstruction. We acknowledge that this cutoff point is somewhat subjective, and anomalously elevated values of Kr/Ar are present in the bottom 2 meters (158-160 meters), suggesting that Xe/Kr may be altered in samples above what we have rejected. However, whether or not we include or reject these slightly shallower samples does not influence the main findings of our study.

The Xe/Kr data for an additional 4 samples that were analyzed for noble gases were either rejected or not available for MOT reconstruction. For three of these samples, this was due to problems encountered during the sample processing and analysis. These problems include 1) the mass spectrometer filament failing mid-analysis (before Xe/Kr was run), 2) the heat tape falling off of the silica gel-filled glass volume during the gettering step, and 3) the magnetic stir bar breaking during the gas extraction. In the latter two cases, samples from the same depth intervals were remeasured, so Xe/Kr data is available. We were also able to test the effect of the heat tape removal by processing an air standard without heating the silica and determined that this leads to a negative Xe/Kr anomaly due to the incomplete desorption and transfer of xenon from the silica gel to the cryostat. We were unable to test the potential effect of a broken stirbar on Xe/Kr. However, the measured value of Xe/Kr was 6-sigma outside of the range of all other data (excluding the deepest samples). We therefore rejected the Xe/Kr for MOT analysis for this sample. Last, we remeasured one sample because it was an apparent outlier compared to samples of similar age and subjectively exclude this sample for MOT analysis based on its disagreement with its replicate. This was a purely subjective decision; including Xe/Kr of this sample for MOT reconstruction does not impact the main findings of the study.

**Calculated sea level change from estimated seawater 𝛿18O changes from 2.7 to 0.5 Ma**

Following ref.25 we use the conservation of total combined ocean / ice sheet mass and isotopic composition to estimate a sea level change between 2.7 and 0.5 Ma:

MOcean-2.7Ma + MGIS-2.7Ma + MWAIS-2.7Ma + MEAIS-2.7Ma + MNHIS-2.7Ma =

MOcean-0.5Ma + MGIS-0.5Ma + MWAIS-0.5Ma + MEAIS-0.5Ma + MNHIS-0.5Ma

MOcean-2.7Ma*ROcean-2.7Ma + MGIS-2.7Ma*RGIS-2.7Ma + MWAIS-2.7Ma*RWAIS-2.7Ma + MEAIS-2.7Ma*REAIS-2.7Ma +

MNHIS-2.7Ma*RNHIS-2.7Ma =

MOcean-0.5Ma*ROcean-0.5Ma + MGIS-0.5Ma*RGIS-0.5Ma + MWAIS-0.5Ma*RWAIS-0.5Ma + MEAIS-0.5Ma*REAIS-0.5Ma +

MNHIS-0.5Ma*RNHIS-0.5Ma

Where M is mass and R is the isotopic ratio of the body of interest. GIS, WAIS, and EAIS respectively refer to the Greenland, West Antarctic, and East Antarctic Ice Sheets. NHIS refers to the collective non-extant Northern Hemisphere Ice Sheets (e.g. Laurentide, Fennoscandian, etc.). In order to calculate the sea level change, we make the following set of assumptions. First, we assume that at 2.7 Ma, the ice sheet / ocean masses and isotopic compositions are comparable to modern. Next, we assume a 4‰ decline in all ice sheets based on the Allan Hills 𝛿18Oice change over this interval4. Last, we assume that between 2.7 Ma and 0.5 Ma, the 0.22‰ increase in seawater 𝛿18O (estimated from MOT and benthic 𝛿18O changes over this interval) is primarily driven by the development/growth of the Northern Hemisphere Ice Sheets, with a mean isotopic composition of -30‰41. The sea level change is then calculated using the mean sea level depth of ref. 42.

Our estimate of a 17-meter decline in sea level between 2.7 and 0.5 Ma comes with a number of caveats. First, our estimate is for a *change* in ice volume between 2.7 Ma and 0.5 Ma rather than the absolute partitioning between ocean temperature and ice volume at either of these times. While – in our calculation - we make an assumption about the ice sheet volumes and isotopic compositions at 2.7 Ma, we may perturb these values substantially (while conserving mass and isotopes), but the estimated *change* in sea level / ice volume remains robust.

The translation of seawater 𝛿18O into sea level / ice volume also strongly depends on the assumption of the mean isotopic composition of the growing/shrinking ice sheet. For instance, if we assume that the seawater 𝛿18O changes are primarily driven by changes in East Antarctic Ice Sheet volume (𝛿18Oice of roughly -60‰), our estimate of sea level change effectively halves. Here we choose a set of assumptions based on available information but acknowledge the sensitivity of our results to these choices.

Last, our decomposition of 𝛿18O changes into temperature and ice effects relies on the robustness of the 𝛿18O benthic records over this interval over this interval. Ref. 43 proposes a potential bias in benthic 𝛿18O since the Pliocene due to diagenetic alteration, resulting in an underestimation of the increasing trend in 𝛿18O between 3 Ma and today by ~0.08‰Ma-1. If we account for this potential secular trend, we would estimate a 0.40‰ change in seawater between 2.7 Ma and 0.5 Ma and (using the above assumptions) predict a 39-meter lowering of sea level across this interval. The change suggested by 𝛿18O of O2 increase across this interval (0.33‰) falls somewhere between these two scenarios. The advantage of using 𝛿18O of O2 as a proxy for seawater 𝛿18O is that it is not subject to this diagenetic alteration. The disadvantage is that we cannot rule out the possibility of a secular trend in the Dole Effect across this interval in contributing to the net 𝛿18O of O2 change. Future work to improve our understanding of the Dole Effect on millennial and orbital timescales will provide valuable insight into how it may (or may not) have changed over this longer period.

**Figure S1. Overview of ice core sites and sample ages.** Left panel shows the location of ice core samples evaluated in this study. On the right, the age-depth profile of ALHIC1901 (bottom) and ALHIC1902 (top) are shown. Orange shading indicates the depth intervals in both cores where Xe/Kr ratios were implausible (see methods).

**Figure S2. MOT reconstructed from Allan Hills samples (blue) compared to previously published results (orange).** Solid filled points show reconstructed MOT with no offset applied. Open circles show reconstructed MOT with a +0.5°C offset.

**Figure S3.** Simulated response of MOT and SST to changes in ice sheet configuration from the TraCE-ICE single forcing experiment20. The left panel shows results for global average SST (x-axis) and MOT (y-axis) relative to the average of the last 5,000 years of the simulation. Marker colors indicate mean Laurentide Ice Sheet height and data are binned into 100-year averages. Other panels show regional SST and MOT changes. Dashed line shows a 1:1 MOT:SST scaling for comparison.
